1  
2  
3  
4  
5  
6  
7  
8  
9  
10  
11  
12  
13  
14  
15  
16  
17  
18  
19  
20  
21  
22  
23  
24  
25  
26  
27  
28  
29  
30  
31  
32  
33  
34  
35  
36  
37  
38  
39  
40  
41  
42  
43

# Discovery of fungal-specific targets and inhibitors using chemical phenotyping of pathogenic spore germination

Sébastien C. Ortiz<sup>1</sup>, Mingwei Huang<sup>1</sup>, and Christina M. Hull<sup>1,2\*</sup>

<sup>1</sup> Department of Biomolecular Chemistry, School of Medicine and Public Health, University of Wisconsin–Madison, Madison, Wisconsin, USA

<sup>2</sup> Department of Medical Microbiology and Immunology, School of Medicine and Public Health, University of Wisconsin–Madison, Madison, Wisconsin, USA

\*To whom correspondence should be addressed

[cmhull@wisc.edu](mailto:cmhull@wisc.edu)

## 44 **Abstract**

45  
46 There is a critical need for new antifungal drugs; however, the lack of available fungal-specific  
47 targets is a major hurdle in the development of antifungal therapeutics. Spore germination is a  
48 differentiation process absent in humans that could harbor uncharacterized fungal-specific  
49 targets. To capitalize on this possibility, we developed novel phenotypic assays to identify and  
50 characterize inhibitors of spore germination of the human fungal pathogen *Cryptococcus*. Using  
51 these assays, we carried out a high throughput screen of ~75,000 drug-like small molecules and  
52 identified and characterized 191 novel inhibitors of spore germination, many of which also  
53 inhibited yeast replication and demonstrated low cytotoxicity against mammalian cells. Using an  
54 automated, microscopy-based, quantitative germination assay (QGA), we discovered that  
55 germinating spore populations can exhibit unique phenotypes in response to chemical inhibitors.  
56 Through the characterization of these spore population dynamics in the presence of the newly  
57 identified inhibitors, we classified 6 distinct phenotypes based on differences in germination  
58 synchronicity, germination rates, and overall population behavior. Similar chemical phenotypes  
59 were induced by inhibitors that targeted the same cellular function or had shared substructures.  
60 Leveraging these features, we used QGAs to identify outliers among compounds that fell into  
61 similar structural groups and thus refined relevant structural moieties, facilitating target  
62 identification. This approach led to the identification of complex II of the electron transport chain  
63 as the putative target of a promising structural cluster of germination inhibitory compounds. These  
64 inhibitors showed high potency against *Cryptococcus* spore germination, while maintaining low  
65 cytotoxicity against mammalian cells, making them prime candidates for development into novel  
66 antifungal therapeutics.

## 67 **Introduction**

68  
69  
70 Human fungal pathogens are an unmitigated problem causing ~1.5 million deaths a year  
71 worldwide (1). One of the biggest hurdles in the treatment of invasive fungal diseases is the lack  
72 of available therapeutics. There are three primary classes of antifungal drugs, all of which are  
73 suboptimal due to properties ranging from high toxicity to humans to rapid microbial resistance  
74 development (2-5). These classes target cell membranes or cell wall components, which have  
75 been the canonical targets for antifungal development (2,6). While these cellular structures  
76 provide fungal-specific targets, the deficiency of novel antifungal agents indicates that new fungal-  
77 specific targets need to be identified and exploited. However, due to the eukaryotic nature of fungi  
78 and resulting conservation of molecular moieties between humans and fungi, the identification of  
79 fungal-specific pathways has been difficult.

80 One proposed solution is to target the process of spore germination (7). Spores are  
81 dormant, stress-resistant cell types formed by many organisms to survive harsh environmental  
82 conditions and/or spread to new environments, and spores are infectious particles for most  
83 invasive human fungal pathogens (8,9). To cause disease, fungal spores must escape dormancy  
84 through the process of germination, a process that appears unlike any in humans, and grow  
85 vegetatively in the host. Due to its specialized nature, spore germination may involve fungal  
86 pathways distinct from those in humans. We hypothesized that the process of spore germination  
87 would harbor new fungal-specific targets, and compounds that inhibit germination would therefore  
88 be less toxic to mammalian cells. Thus, germination inhibitors would be prime candidates for  
89 development into antifungal drugs for the prevention and/or treatment of many invasive fungal  
90 diseases.

91 The development of new antifungal drugs has been slow relative to other antimicrobial  
92 agents such as those against bacteria and viruses, despite significant screening efforts (10).  
93 Traditionally, the primary method for identifying antifungal compounds was based on tracking

94 changes in a biologically relevant readout such as fungal growth (Phenotypic Drug Discovery).  
95 While this approach yielded many antifungal compounds over the years, most were also toxic to  
96 mammalian cells. As molecular techniques advanced, researchers in many fields moved toward  
97 Targeted Drug Discovery, which relies on identification of inhibitors of a specific, known molecular  
98 target. This approach proved to be useful in some arenas; however, it largely failed for antifungal  
99 drug development presumably because of a lack of identified fungal-specific targets. As a result,  
100 no new classes of antifungal therapeutics have come to market in the last 20 years, and there is  
101 renewed interest in phenotypic drug discovery (2,11). However, because growth inhibition  
102 screening alone has been used exhaustively as a target phenotype in fungi, for the promise of  
103 phenotypic drug discovery to be fully realized, the field must improve upon traditional growth  
104 screening methods and/or couple them with novel assays (10).

105 To address this need, we used fundamental biological discoveries of pathogenic spore  
106 biology to drive the development of two new phenotypic assays that use spore germination as a  
107 readout. The first is a luciferase-based assay for high throughput screening of compounds to  
108 identify germination inhibitors, and the second is an automated, quantitative, microscopy-based  
109 germination assay for high-resolution evaluation of large populations of germinating spores. We  
110 developed these tools for use with the spores of the invasive human fungal pathogen  
111 *Cryptococcus*. This environmental budding yeast is the leading cause of fatal fungal disease  
112 worldwide, causing several hundred thousand deaths per year, particularly among people with  
113 compromised immune systems (5). The *Cryptococcus* system is known among human fungal  
114 pathogens to be well-developed with many molecular and genetic tools. In addition, *Cryptococcus*  
115 spores germinate synchronously under nutritionally favorable conditions and do so largely  
116 independent of spore density (12). These unique properties facilitated the development of the  
117 phenotypic germination assays that we used to identify and characterize 191 novel fungal  
118 germination inhibitors. We discovered that population level dynamics could be used to classify  
119 distinct chemical phenotypes, and we used those classifications to show that compounds with  
120 similar substructures demonstrated similar chemical phenotypes. This process led to the rapid  
121 identification of phenotypic outliers and facilitated target identification, resulting in the discovery  
122 of a novel set of fungal-specific electron transport chain inhibitors that are prime candidates for  
123 development into a new class of antifungal drugs for use in the prevention of fatal fungal diseases.  
124

## 125 Results

### 126 *Eukaryotic translation inhibitors prevent initiation of Cryptococcus spore germination*

127  
128  
129 Prior studies of *Cryptococcus* spore germination showed that different conditions, mutants, and  
130 drugs alter the behavior of spore populations during germination (7,12). Based on these findings,  
131 we hypothesized that characterizing the behaviors of spore populations under different conditions  
132 would facilitate the identification of specific cellular processes required for spore germination.  
133 Because new protein synthesis is known to be required for successful germination in many fungi  
134 (13), we treated populations of spores under germinating conditions with the eukaryotic ribosome  
135 inhibitor cycloheximide, and evaluated their responses using our quantitative germination assay  
136 (QGA).

137 In this automated, microscopy-based assay, germination progression of spores is  
138 monitored as a function of changes in cell morphology over time (spores are small and oval; yeast  
139 are large and circular). Individual spores in a population ( $\sim 1 \times 10^4$  per sample) are measured to  
140 determine size (area) and shape (aspect ratio) from the onset of germination, and the data are  
141 collected for each cell over the time of germination (**Figure 1A**). Using the QGA, we determined  
142 that a concentration of 10  $\mu\text{M}$  cycloheximide fully prevented spores from initiating any changes in

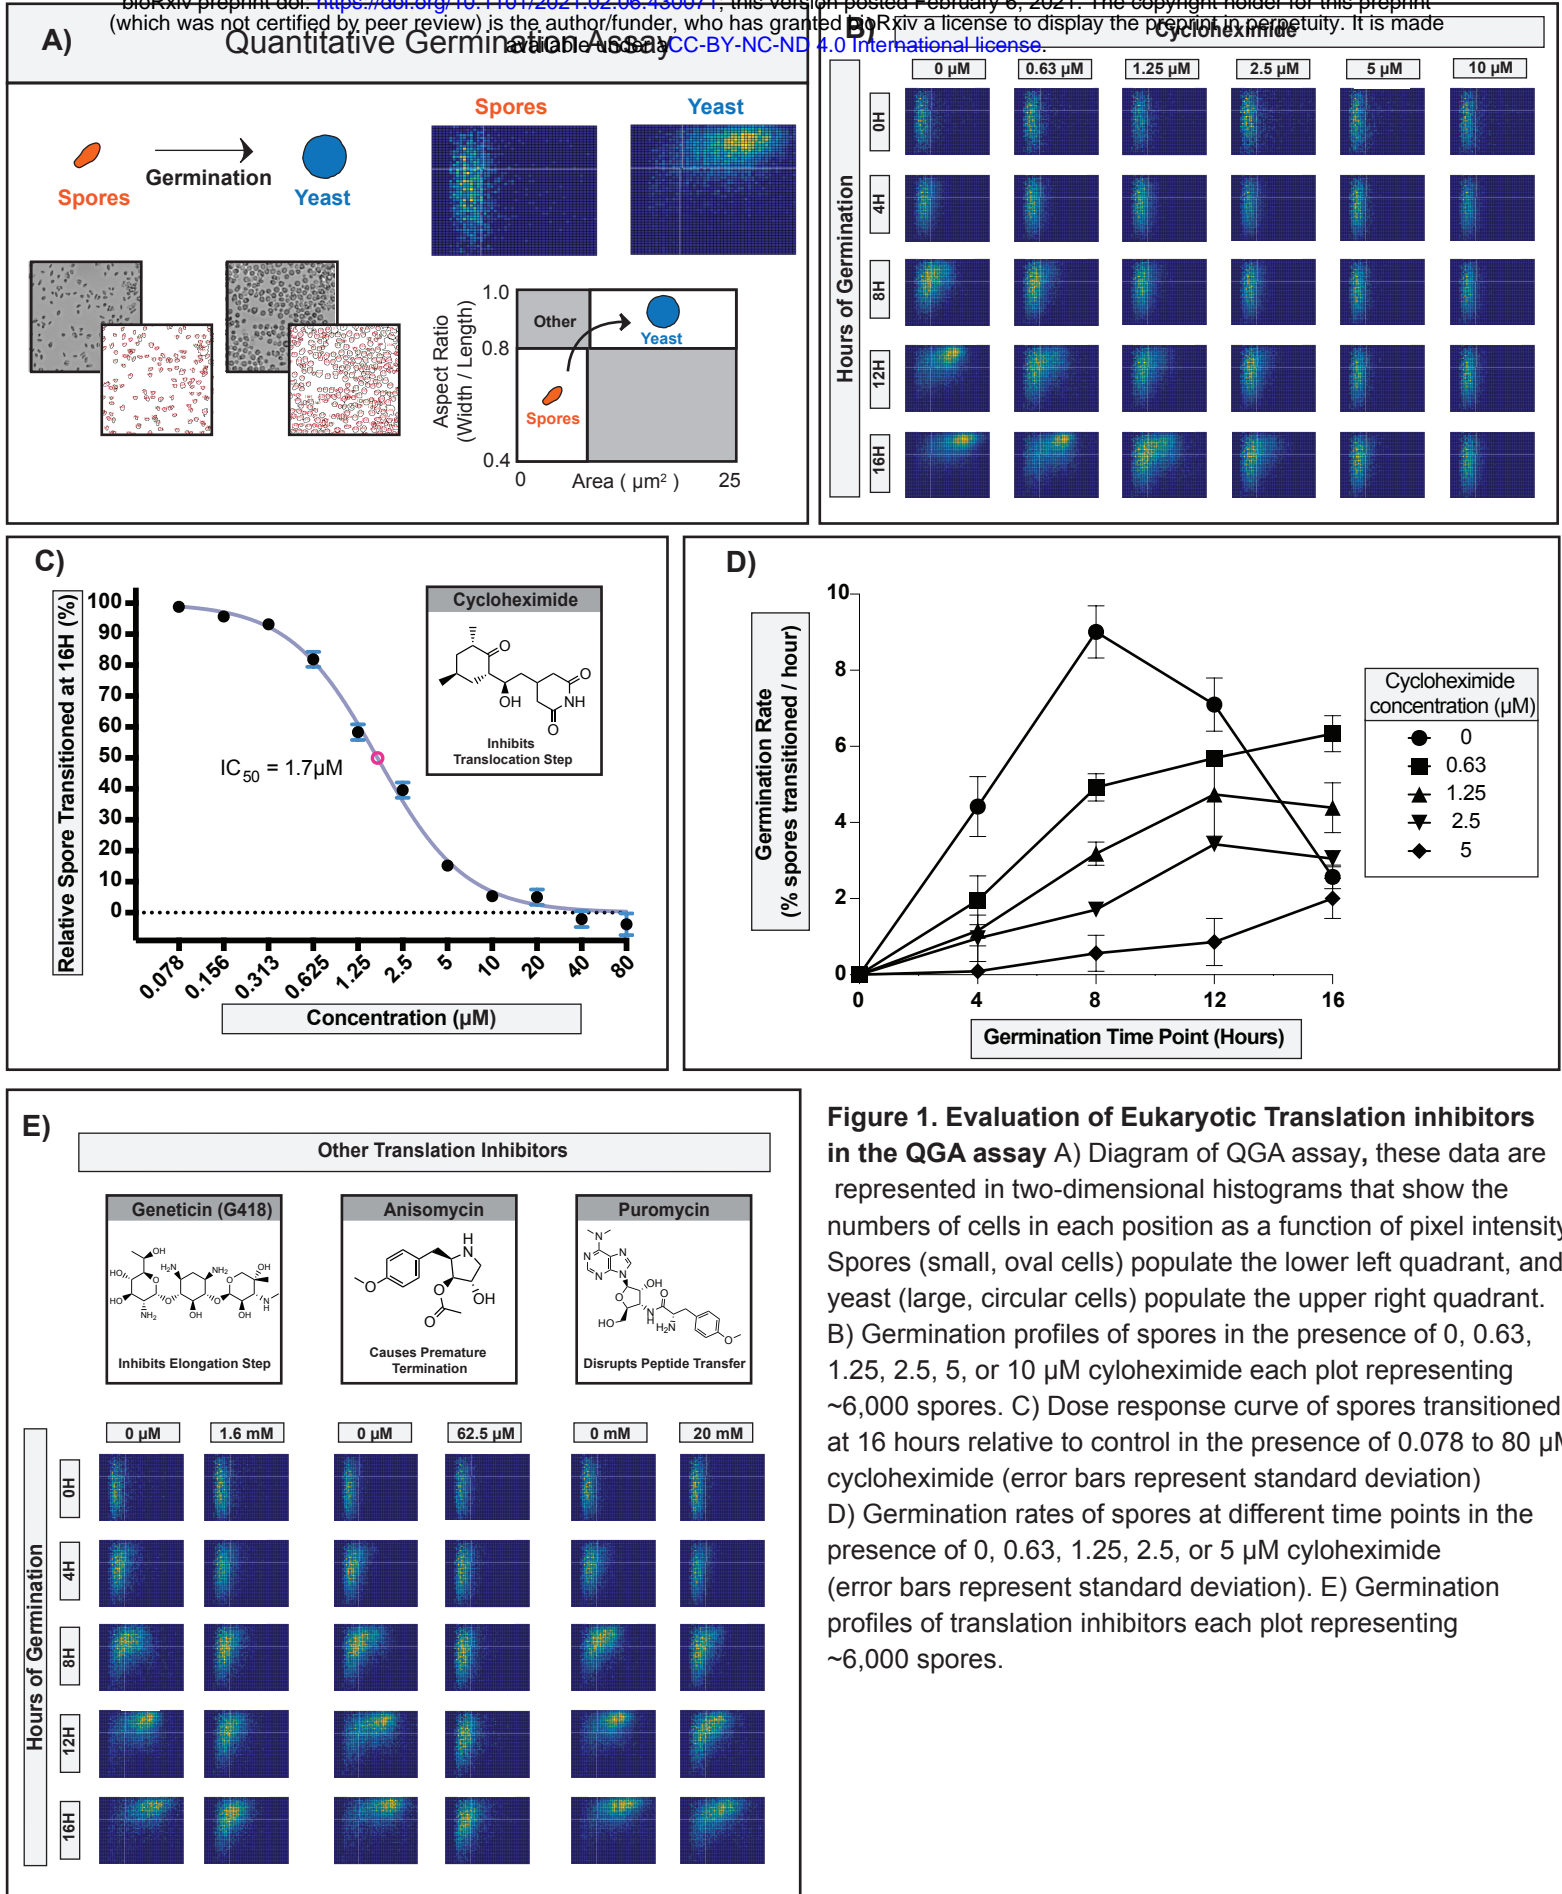

**Figure 1. Evaluation of Eukaryotic Translation inhibitors in the QGA assay** A) Diagram of QGA assay, these data are represented in two-dimensional histograms that show the numbers of cells in each position as a function of pixel intensity. Spores (small, oval cells) populate the lower left quadrant, and yeast (large, circular cells) populate the upper right quadrant. B) Germination profiles of spores in the presence of 0, 0.63, 1.25, 2.5, 5, or 10 µM cycloheximide each plot representing ~6,000 spores. C) Dose response curve of spores transitioned at 16 hours relative to control in the presence of 0.078 to 80 µM cycloheximide (error bars represent standard deviation) D) Germination rates of spores at different time points in the presence of 0, 0.63, 1.25, 2.5, or 5 µM cycloheximide (error bars represent standard deviation). E) Germination profiles of translation inhibitors each plot representing ~6,000 spores.

143 size or shape, indicating full inhibition of germination and suggesting that new protein synthesis  
144 is required for *Cryptococcus* spores to germinate (**Figure 1B**).

145 As the concentration of cycloheximide decreased, the amount of germination increased,  
146 exhibiting concentration-dependent inhibition of germination with an IC<sub>50</sub> of 1.7 μM (**Figure 1C**).  
147 In addition, we observed that even as the germination of the population of spores was slowing  
148 down due to inhibition, all of the spores responded in a similar manner and maintained their  
149 synchronous response (**Figure 1B**). While the overall rate of germination for the population  
150 changed in response to cycloheximide, other properties were unchanged (population  
151 synchronicity, pattern of morphological changes, integrity of individual spores), which facilitated  
152 the determination of specific rates of germination (i.e. transition out of the spore state) at each  
153 concentration tested (**Figure 1D**). We observed that as the concentration of cycloheximide  
154 increased, germination rates decreased, causing a “slow down” phenotype across the population.

155 From these data we concluded that new protein synthesis was likely required very early  
156 in the germination process. We further surmised that if the cycloheximide phenotype were specific  
157 to inhibition of protein translation (as opposed to off-target effects), other inhibitors of eukaryotic  
158 protein translation would produce the same phenotype. To test this hypothesis, we evaluated 3  
159 structurally distinct inhibitors of eukaryotic protein translation (geneticin, anisomycin, and  
160 puromycin) and determined their effects in QGAs (**Figure 1E**). Although the inhibitors showed  
161 different potencies against germination (i.e. different concentrations were required to achieve  
162 similar effects), all three inhibitors caused a “slow down” phenotype that maintained population  
163 synchronicity, mimicking cycloheximide.

164 Together, these data show that for each inhibitor, the QGA was an effective method for  
165 determining a concentration-dependent phenotype, determining precise inhibitory concentrations,  
166 and quantitating changes in germination rates. Furthermore, the consistent phenotypes across  
167 translation inhibitors suggested that inhibitors targeting the same cellular function generate a  
168 similar phenotype in the QGA. These findings indicated that QGAs would be a powerful tool in  
169 the validation, prioritization, and characterization of diverse germination inhibitors with unknown  
170 targets.

### 171 *Combined HTS and QGA analysis identified 191 novel germination inhibitors*

172  
173 To identify potential inhibitors of spore germination, a NanoLuciferase (NL)-based high throughput  
174 screening assay was developed, and compounds from three libraries of structurally diverse, drug-  
175 like small molecules (LifeChem 1-3) were screened (**Figure S1**). For the assay, a previously  
176 identified protein (CNK01510) was fused to the NanoLuciferase protein (Promega) and introduced  
177 into its endogenous locus in the *Cryptococcus* genome (14). Strains harboring the integrated NL  
178 protein fusion were crossed under sexual development conditions to produce spores. Spores from  
179 the NL strains yielded very little NL enzyme activity; however, yeast from those strains produced  
180 robust NL signal. Most importantly, the amount of NL signal correlated with germination state. As  
181 spores germinated into yeast, the levels of NL signal increased, resulting in a robust signal over  
182 baseline at the end of germination (~14-fold) (**Figure S1**). Inhibitors of germination (e.g.  
183 cycloheximide) caused low levels of NL signal, and solvent-only controls (e.g. DMSO) affected  
184 neither germination nor NL signal (**Figure S1**). Of the ~75,000 compounds screened, ~2100  
185 compounds caused a ≥20% decrease in NL signal relative to the solvent-only control and were  
186 rescreened in duplicate. Compounds that showed ≥50% inhibition of the NL control signal were  
187 selected, resulting in 238 putative germination inhibitors. Secondary screens were performed on  
188 these hits to determine effects on yeast replication, cytotoxicity against mammalian fibroblasts,  
189 and direct inhibition of the NL enzyme (**Doc S1**).

191 To confirm that the 238 hits from the high throughput screen were bona fide inhibitors of  
192 germination, each compound was tested in the QGA. One hundred ninety-one of the 238 HTS  
193 hits showed inhibition of germination at a single, relatively high concentration (80 μM) in this assay

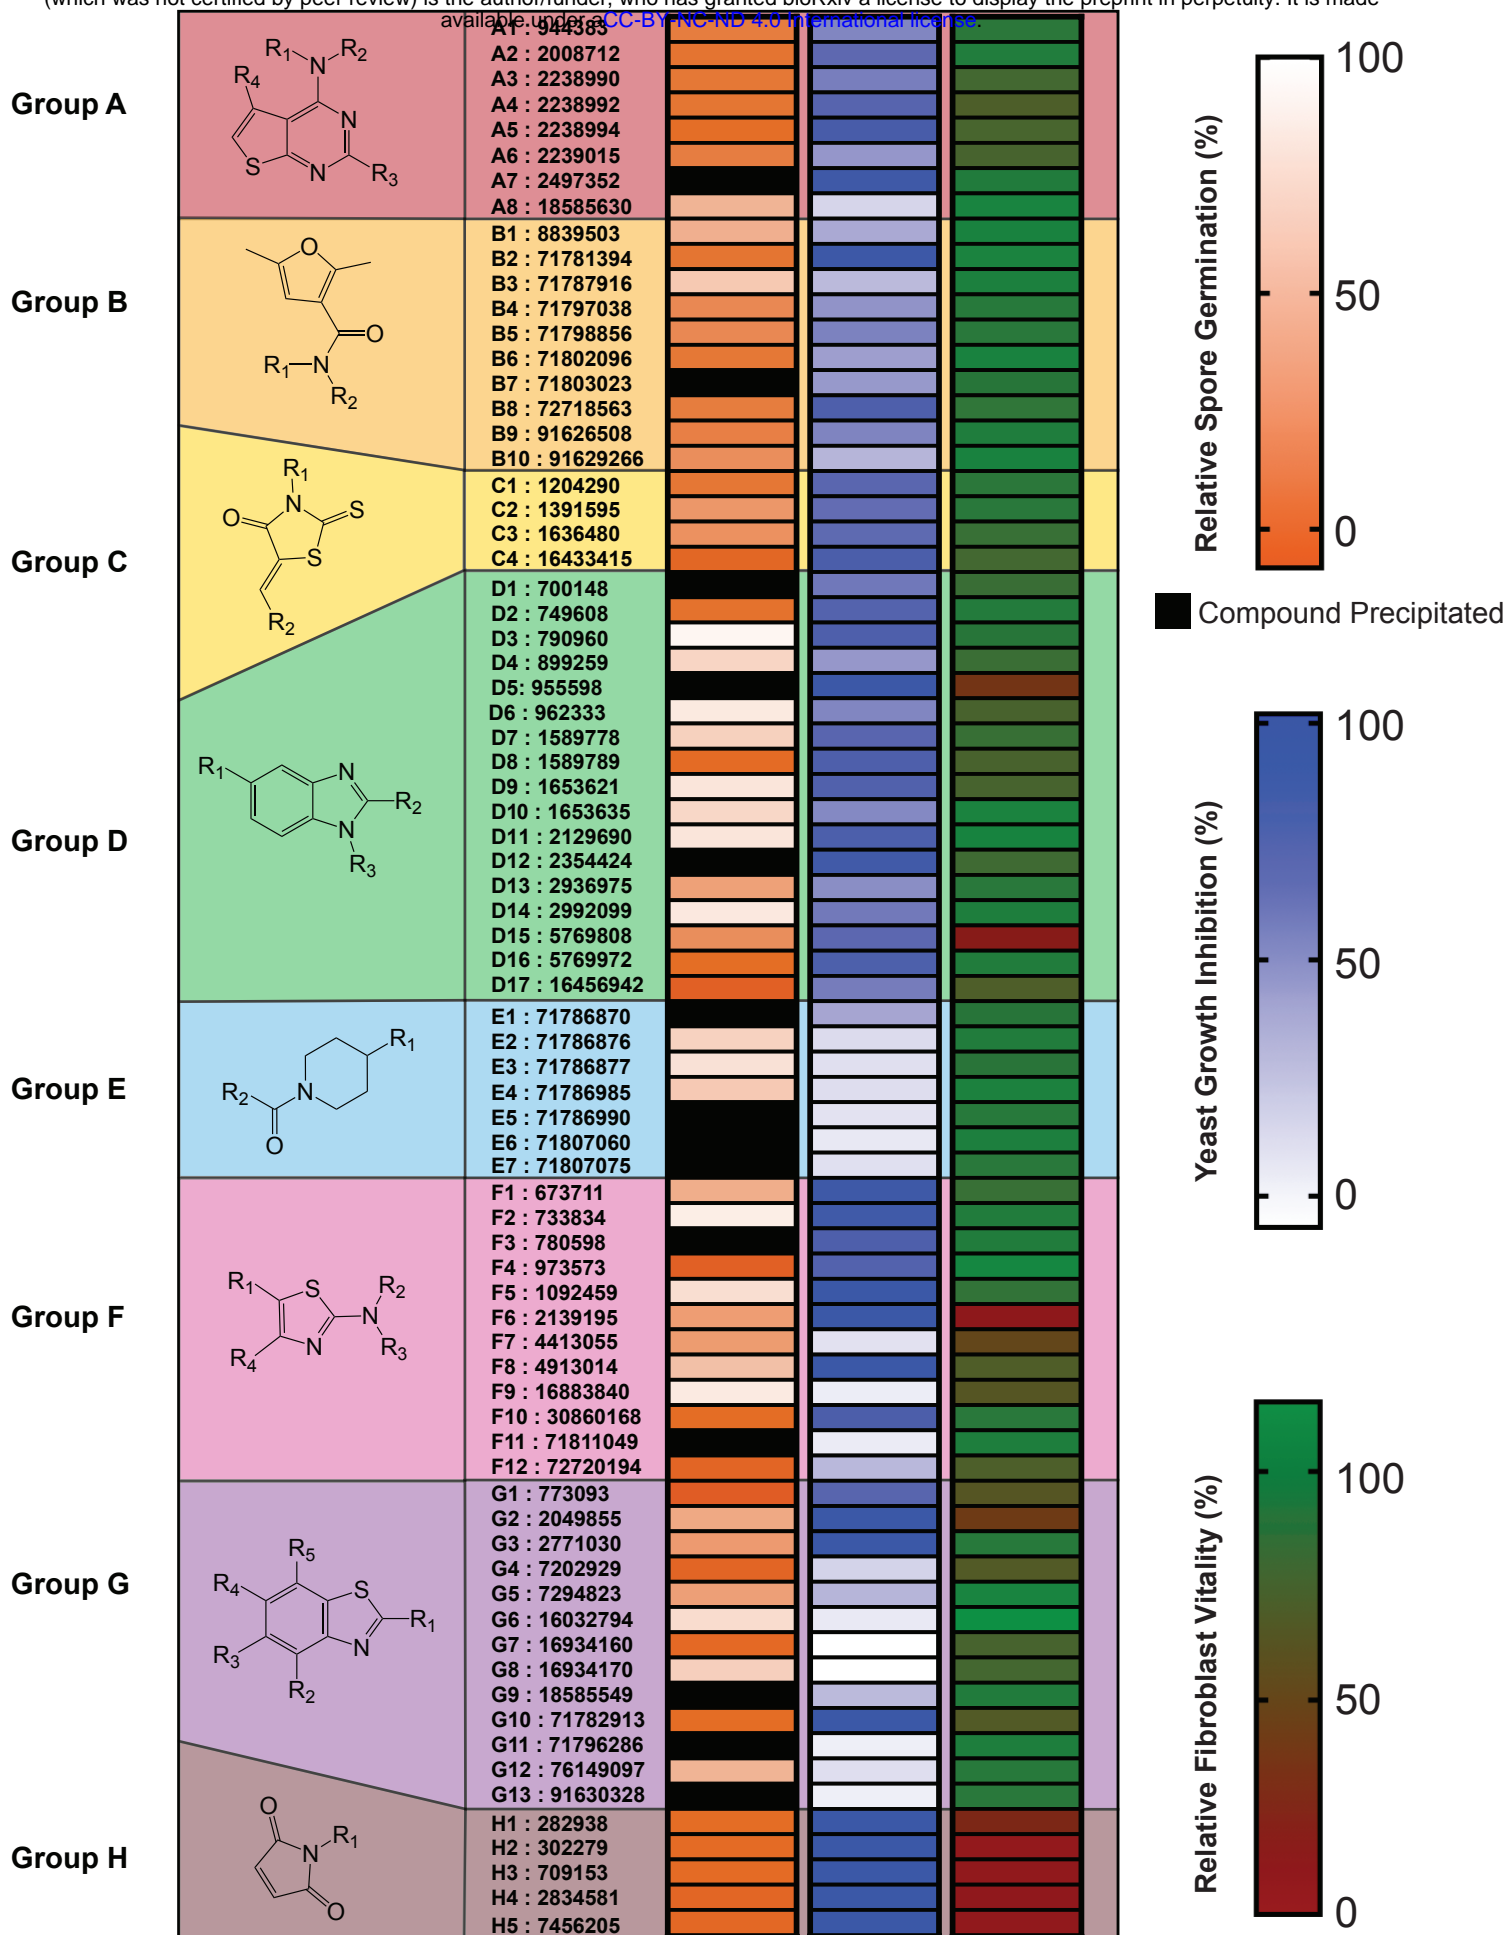

**Figure 2. Groups (8) of compounds (76) identified and confirmed as germination inhibitors with shared substructures.** Diagram of the each substructure with alphabetic assignments followed by their Pubchem CIDs for ease of identification. Heatmap representing level of relative spore germination (at 80uM), level of yeast growth inhibition (at 10uM) and level of relative fibroblast vitality (at 10uM).

194 **(Doc S2)**. The majority of these confirmed germination inhibitors (121/191) showed low  
195 cytotoxicity to mammalian cells (<25% decrease in cell viability), and 167 of 191 caused at least  
196 10% inhibition of yeast growth at 10  $\mu$ M. Six of the 191 germination inhibitors were also inhibitors  
197 of the NL enzyme assay. Overall, the QGA was highly effective for validation of HTS hits and  
198 provided a high-confidence library of 191 novel germination inhibitors, resulting in the largest  
199 discovery of novel, confirmed fungal germination inhibitors in any system. Because the majority  
200 of these inhibitors exhibited low preliminary cytotoxicity against mammalian cells, the data  
201 supported the idea that germination could serve as a reservoir of fungal-specific drug targets.

202 Upon evaluation of the structures of the 191 confirmed inhibitors, we discovered that 76  
203 of the compounds fell into 8 distinct groups with shared substructures, each of which contained 4  
204 or more compounds (**Figure 2**). The identification of multiple groups of similarly structured  
205 compounds from a library of diverse small molecules is advantageous because similarly  
206 structured compounds are likely to have shared molecular targets (15,16). Compounds that had  
207 shared substructures with other inhibitors, showed potent inhibition of both spore germination and  
208 yeast growth, and exhibited low mammalian cell toxicity (**Figure 2**) were prioritized for further  
209 investigation.

210

### 211 QGA titrations of germination inhibitors identified 6 discernable phenotypes

212

213 Because our QGA data with translation inhibitors showed that inhibiting molecular targets  
214 within a specific cellular function resulted in a shared phenotype (**Figure 1**), we hypothesized that  
215 compounds with shared substructures would induce shared phenotypes. To determine potential  
216 “chemical phenotypes,” we titrated 86 confirmed germination inhibitors in the QGA. We  
217 discovered six different phenotypes, and they were distinguished from one another on the basis  
218 of differences in germination synchronicity, germination rates, and overall population behavior.  
219 These phenotypes fell into two general categories: “homogeneous germination” and  
220 “heterogeneous germination” (**Figure 3A**).

221 “Homogeneous germination” phenotypes occurred when spores germinated  
222 synchronously as a population but at a slower rate, and individual spores were affected equally  
223 throughout the population. In this category there were three phenotypes, which were distinguished  
224 by the time point at which germination was most inhibited and were quantified by changes in  
225 germination rates. The most common of these (~30% of all inhibitors tested) was the (I) Slow  
226 Down phenotype in which the population of spores germinated synchronously but at a slower rate  
227 over 16 hours of germination (**Figure 3A, rows 1-3**). The (II) Slow Start phenotype occurred with  
228 a single inhibitor at the beginning of germination. After initial inhibition (occurring between 0 and  
229 ~8 hours), the rate of germination increased rapidly as spores overcame the inhibition. The (III)  
230 Slow End phenotype occurred with a handful of inhibitors in which the population of spores initially  
231 germinated at a normal rate but exhibited a reduced rate later in germination (after ~8 hours).  
232 This inhibition was observed primarily at the point in germination (~8 hours) when spores that had  
233 germinated into small, circular cells became uniformly larger (via isotropic growth). All three of  
234 these phenotypes showed slower rates of germination, but the points of inhibition and rates of  
235 germination varied among them (**Figure 3B**).

236 “Heterogeneous germination” phenotypes occurred when spores no longer germinated  
237 synchronously as a population, and individual spores were affected differently. In this category,  
238 there were three phenotypes, all related to how a lack of synchrony manifested across a  
239 population. The most common of these inhibition phenotypes (~50% of inhibitors tested) was the  
240 (IV) Asynchrony phenotype, in which a population of spores lost synchronous germination, and  
241 different levels of inhibition were observed across the population, resulting in large variations in  
242 cell shapes and sizes (**Figure 3A, rows 4-6**). A (V) Bimodal phenotype occurred with several  
243 inhibitors when the population split in two groups with part of the population experiencing  
244 complete inhibition and the other germinating normally, resulting in a bimodal distribution. The

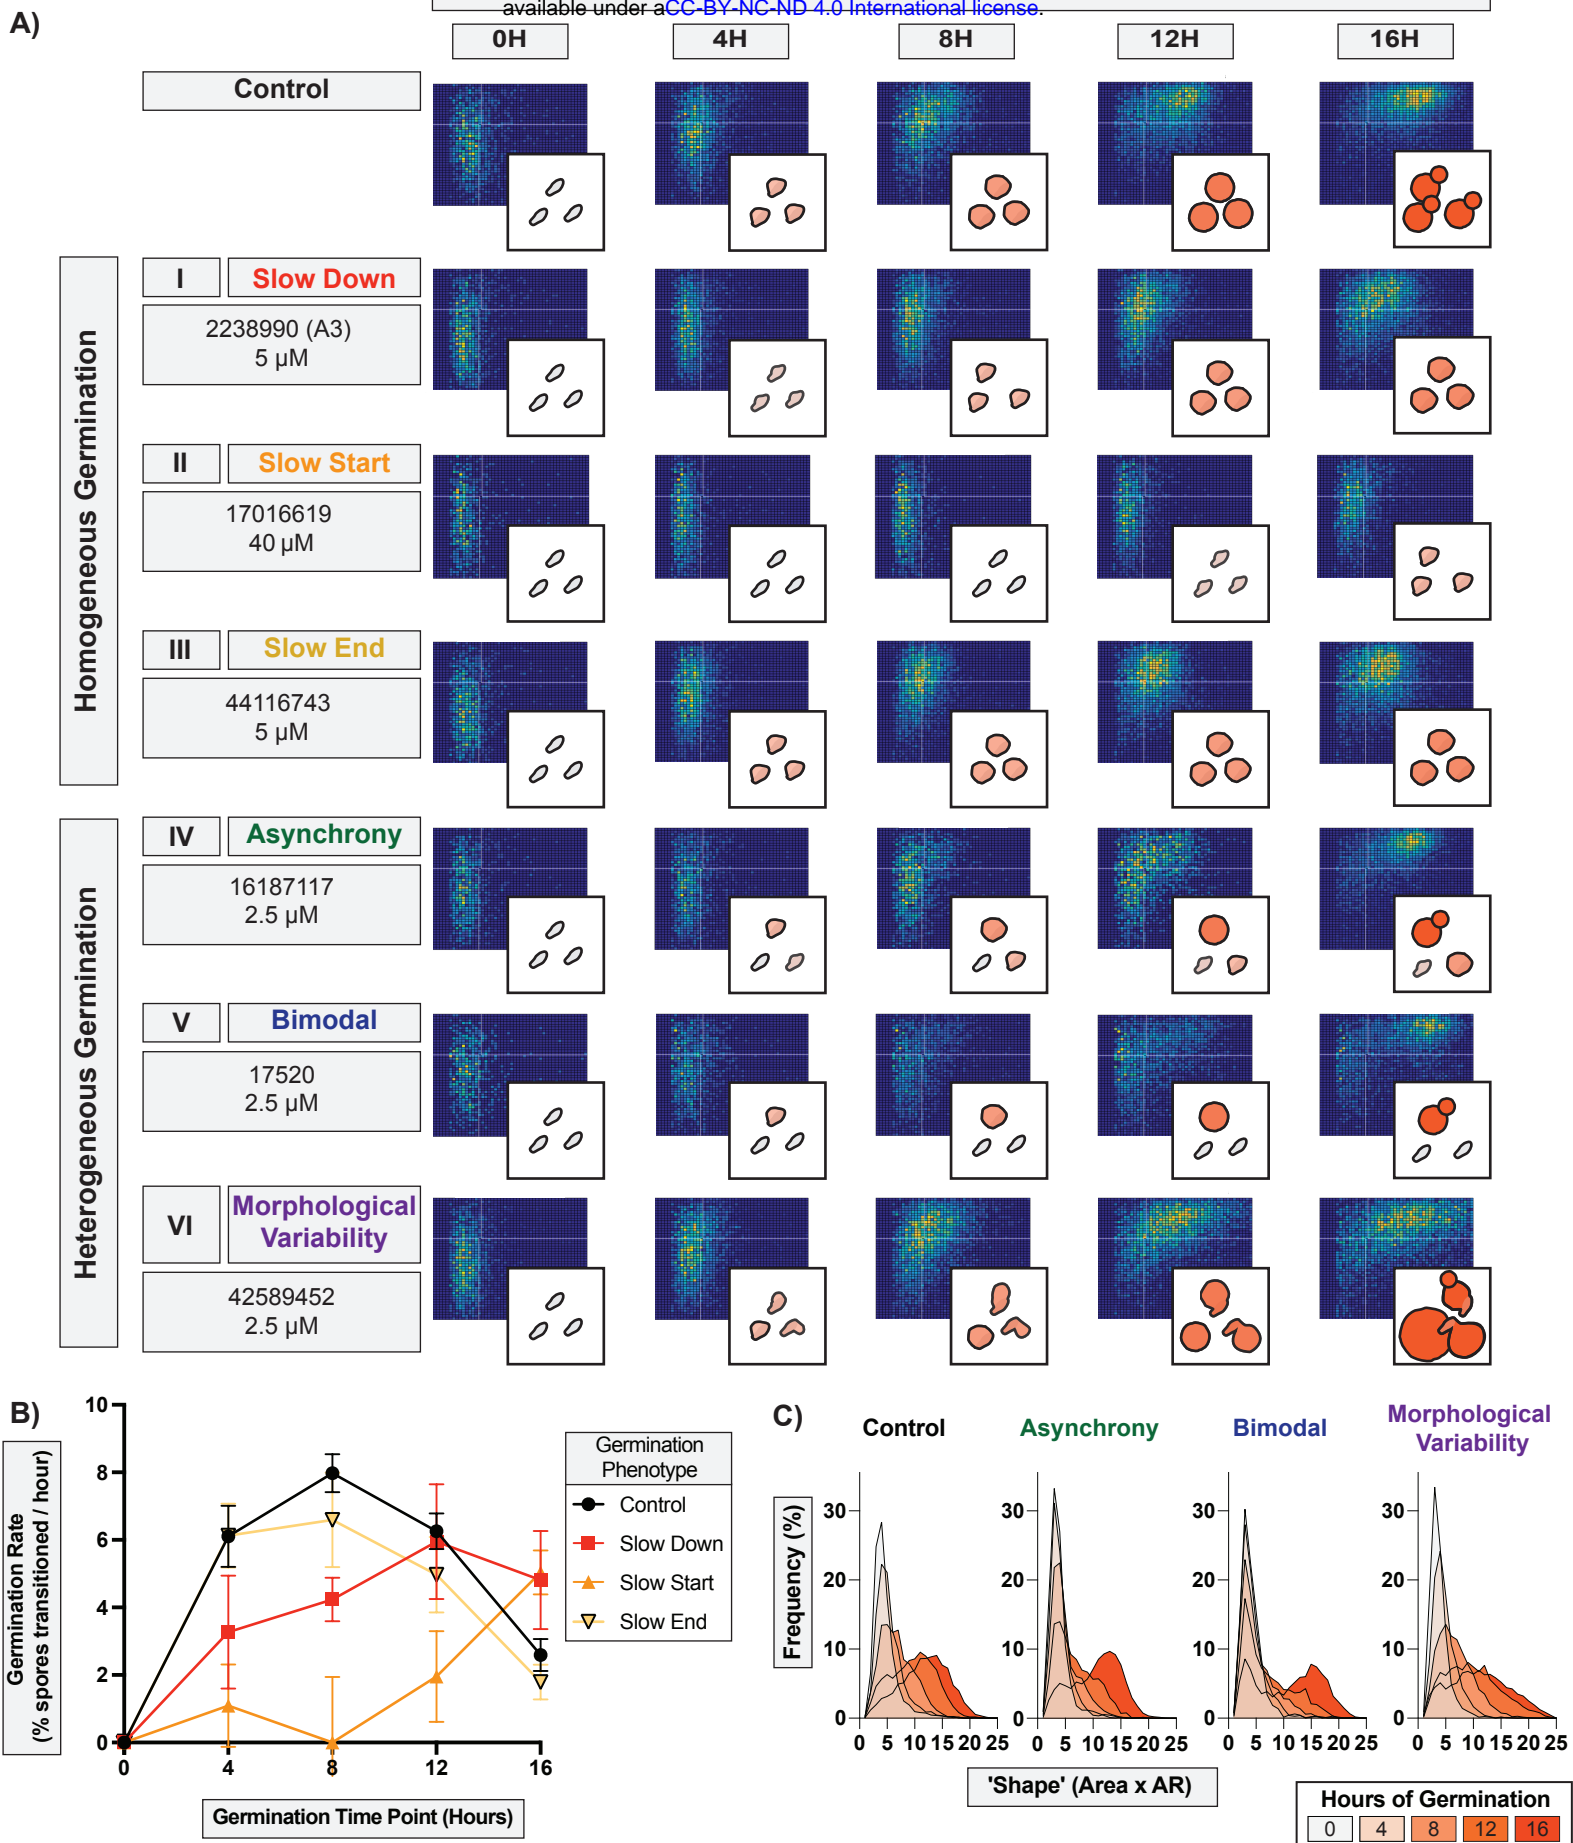

**Figure 3. Characterization of germination inhibition phenotypes.** A) Germination profiles and representative diagrams of distinct phenotypes divided into homogeneous germination (i) slow down, (ii) slow start, (iii) slow end and heterogeneous germination (IV) asynchrony, (V) bimodal, (VI) morphological variability, each plot representing ~6,000 spores B) Germination rates of spores at different time points during different homogeneous germination phenotypes (error bars represent standard deviation). C) Population morphological spread over 16 hours for heterogeneous germination phenotypes.



245 (VI) Morphological Variability phenotype occurred with only two inhibitors when spores  
246 germinated into cells with a variety of sizes and shapes, resulting in a higher proportion of more  
247 elongated and/or very large cells. This led to a more variable morphology in yeast once fully  
248 germinated. These three phenotypes demonstrate that spores in a population can respond  
249 differently to germination conditions and be distinguished by population-level and individual  
250 morphological differences (**Figure 3C**). While the phenotypes observed were not necessarily a  
251 comprehensive accounting of all germination phenotypes, they provided an opportunity to further  
252 parse the 191 inhibitors into groups and evaluate structure-function relationships.

253

#### 254 Similarly-structured compounds elicit the same germination phenotypes

255

256 To test the hypothesis that compounds with shared substructures would induce shared  
257 phenotypes, we evaluated structural groups A and B in more detail. If similarly-structured  
258 compounds showed similar phenotypes, it would support the idea that they share the same target.  
259 Groups A and B were chosen because they 1) contained a relatively large number of compounds  
260 with similar substructures (8 and 10, respectively), 2) displayed generally strong inhibition of  
261 germination at 80  $\mu$ M, 3) were able to inhibit yeast growth to varying degrees, and 4) exhibited  
262 low cytotoxicity to mammalian cells.

263 Group A is composed of 8 compounds with a *Thieno[2,3-D]Pyrimidin-4-Amine*  
264 substructure. To identify the phenotypes of inhibition for group A, we carried out titrations of each  
265 at concentrations from 2.5  $\mu$ M to 80  $\mu$ M (**Figure 4A, B**). The majority of group A compounds (A1-  
266 A7) demonstrated clear “slow down” germination phenotypes; however, A8 showed the  
267 “asynchrony” phenotype. This phenotypic discrepancy suggests that A8 interacts differently with  
268 spores and may have a different cellular target. For this reason, A8 likely does not belong in this  
269 grouping of compounds and was considered an outlier during further characterization of group A.  
270 To determine the mammalian cytotoxicity of these inhibitors, dose response cytotoxicity assays  
271 were performed on fibroblasts with A1-A7 at concentrations from 2.5  $\mu$ M to 80  $\mu$ M (**Figure 4C**).  
272 These assays showed that Group A compounds exhibited relatively low cytotoxicity against  
273 mammalian cells at relevant inhibitory concentrations. Notably, potency of spore germination  
274 inhibition was not related to levels of mammalian cytotoxicity as exemplified by the strongest  
275 inhibitor in this group (A5) showing >80% germination inhibition at 5  $\mu$ M and <20% cytotoxicity at  
276 concentrations as high as 80  $\mu$ M. This suggests that structural moieties in this group could be  
277 altered to maximize antifungal activity while minimizing cytotoxicity. Together, these data support  
278 the hypothesis that similarly structured compounds demonstrate similar phenotypes of inhibition  
279 and that phenotypic characterization can identify outliers in structural groups. These results  
280 further support that group A compounds target the same biological process, have low cytotoxicity,  
281 and are promising candidates for antifungal development and target identification.

282 Group B is composed of 10 compounds with a *2,5-dimethylfuran-3-carboxamide*  
283 substructure. To identify phenotypes of inhibition for group B, we titrated these compounds at  
284 concentrations from 2.5  $\mu$ M to 80  $\mu$ M (**Figure 5A, B**). While the 10 inhibitors showed varying  
285 abilities to inhibit germination, all 10 demonstrated a clear “asynchrony” germination phenotype.  
286 Cytotoxicity assays were performed at concentrations from 2.5  $\mu$ M to 80  $\mu$ M (**Figure 5C**) and  
287 showed that group B compounds exhibit relatively low cytotoxicity against mammalian cells at  
288 relevant inhibitory concentrations. Again, potency of spore germination inhibition was not related  
289 to levels of mammalian cytotoxicity. For example, the strongest inhibitor in this group (B2) showed  
290 >75% germination inhibition at 5  $\mu$ M and  $\leq$ 25% cytotoxicity at concentrations as high as 80  $\mu$ M.  
291 As for Group A, these data suggest that all group B compounds target the same biological  
292 process, providing another group of promising candidates for further development.

293

#### 294 Complex II of the Electron Transport Chain is the likely target of Group B compounds

295

A)

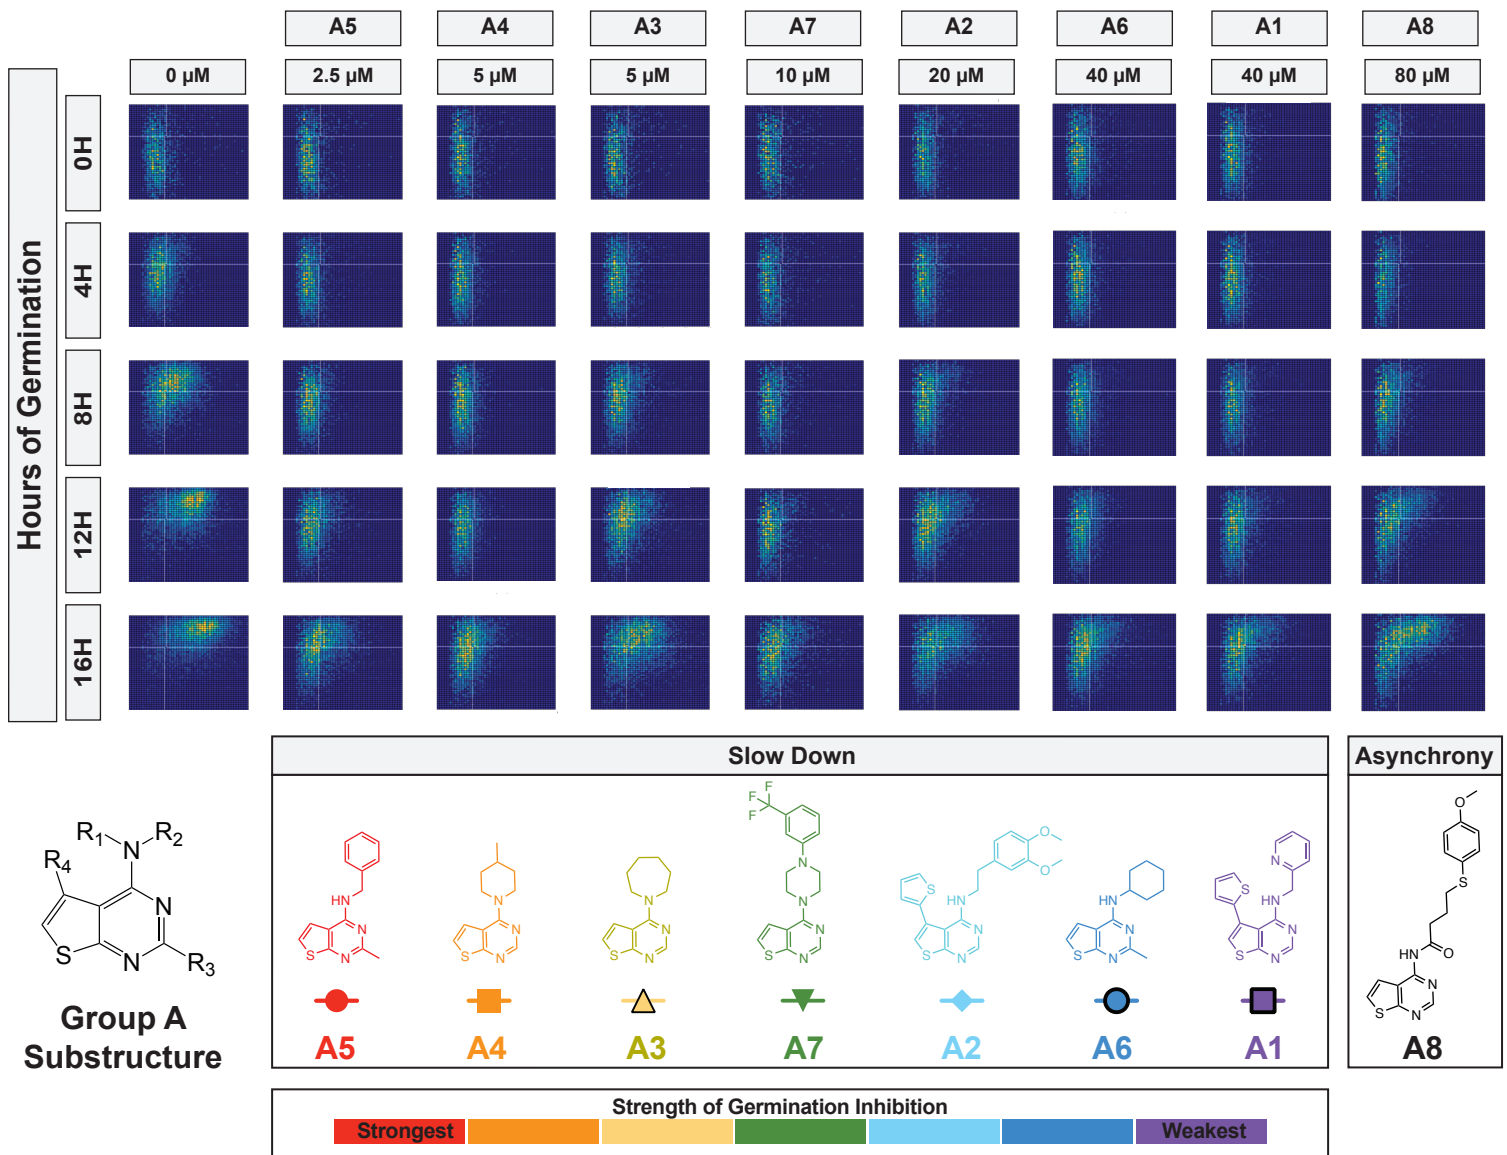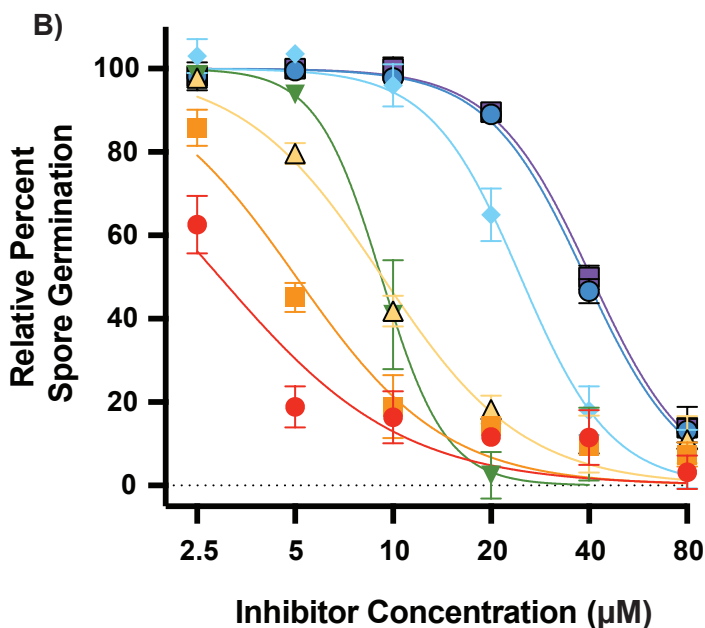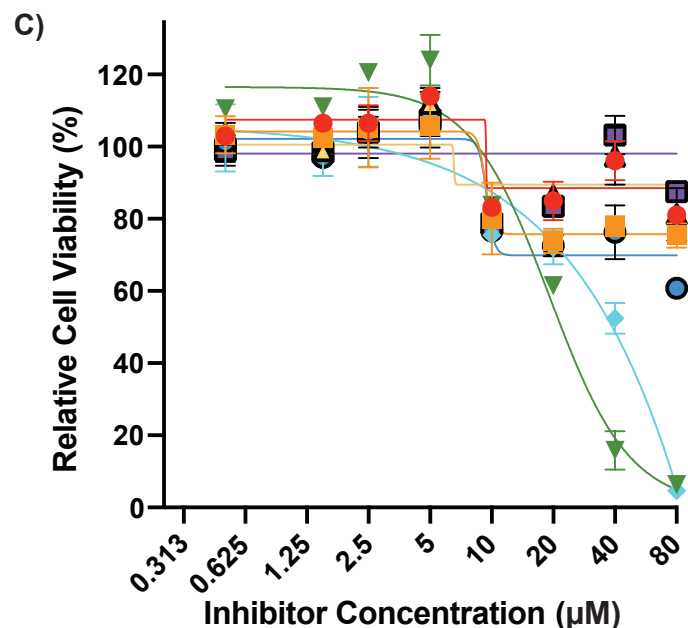

**Figure 4. Characterization of group A compounds.** Germination profiles of spores at phenotypic concentrations in the presence of group A compounds, each plot representing ~6,000 spores. B) Dose response curves of compounds A1 - A7 at concentrations from 2.5 to 80  $\mu\text{M}$  (error bars represent standard deviation). If inhibitors precipitated at higher concentrations, the data point was removed. C) Cytotoxicity against mammalian fibroblasts dose response curves (error bars represents standard deviation).

A)

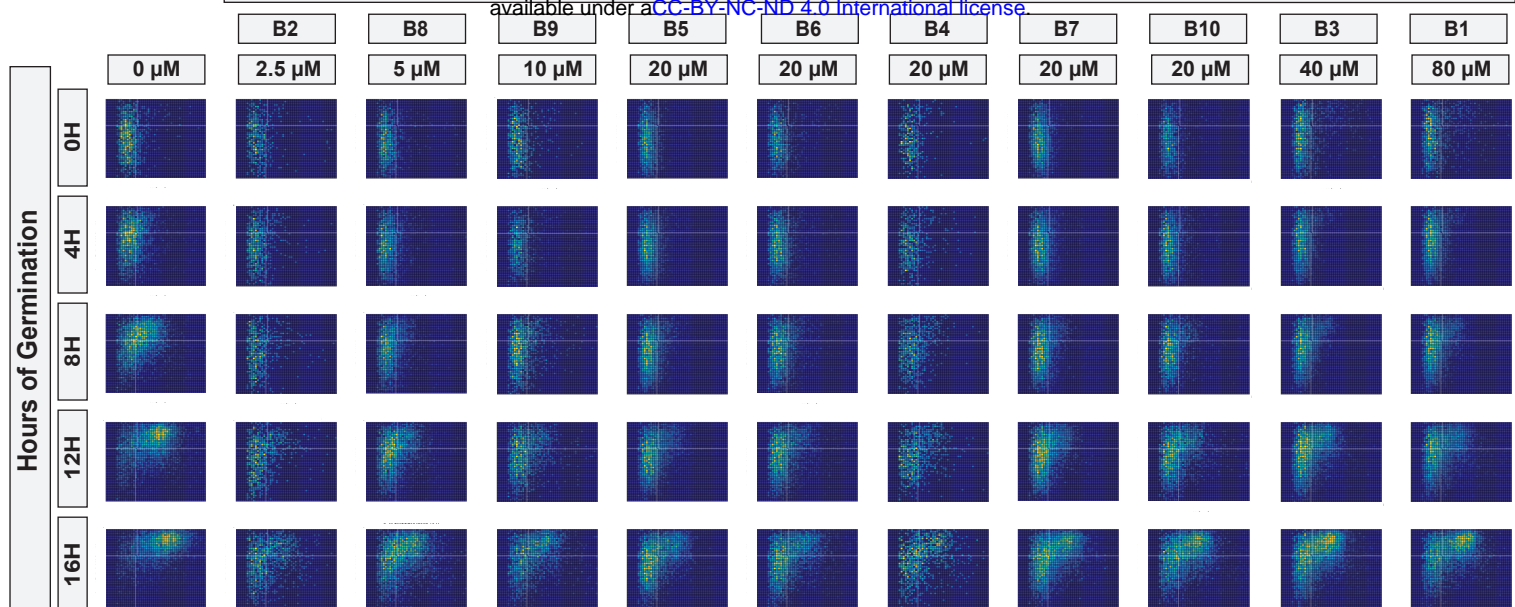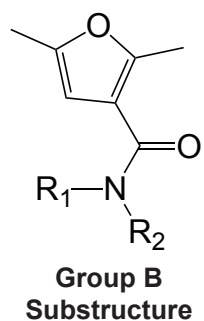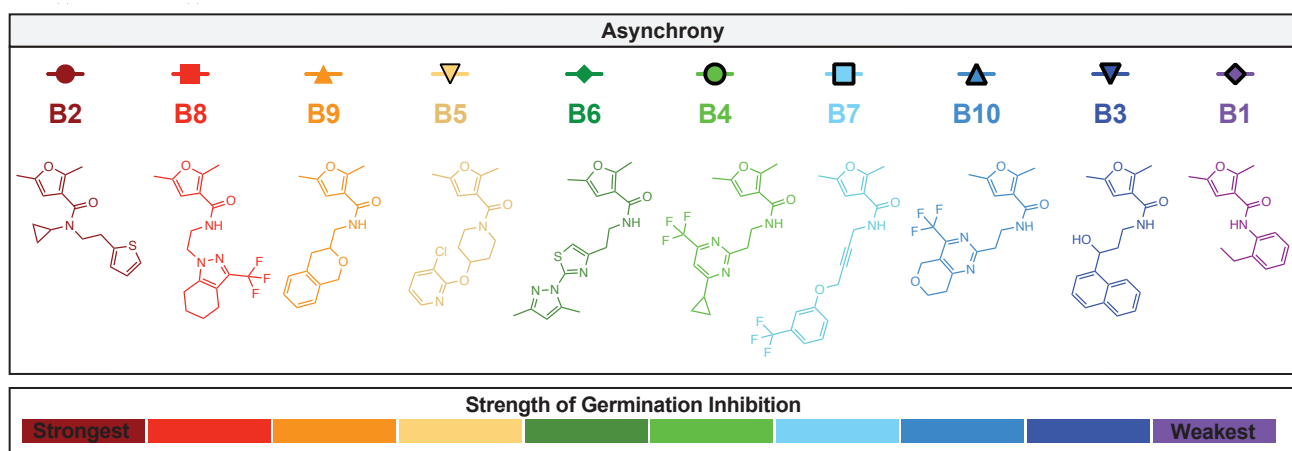

B)

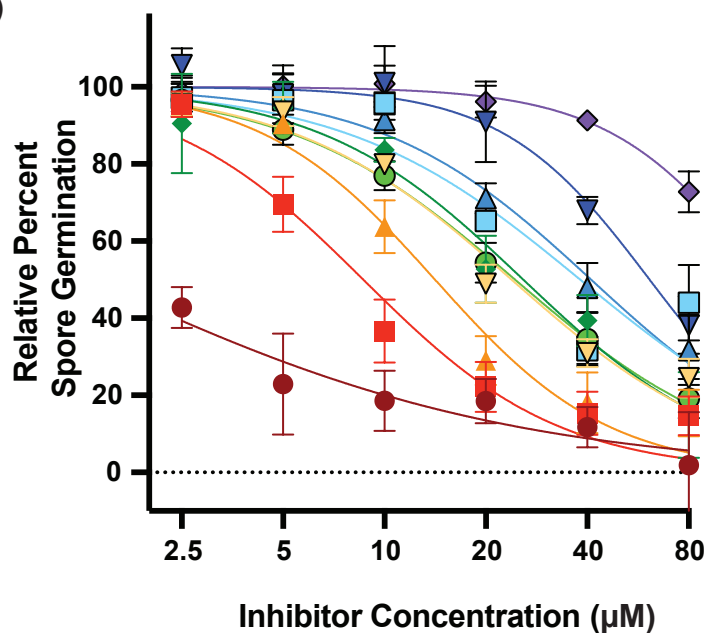

C)

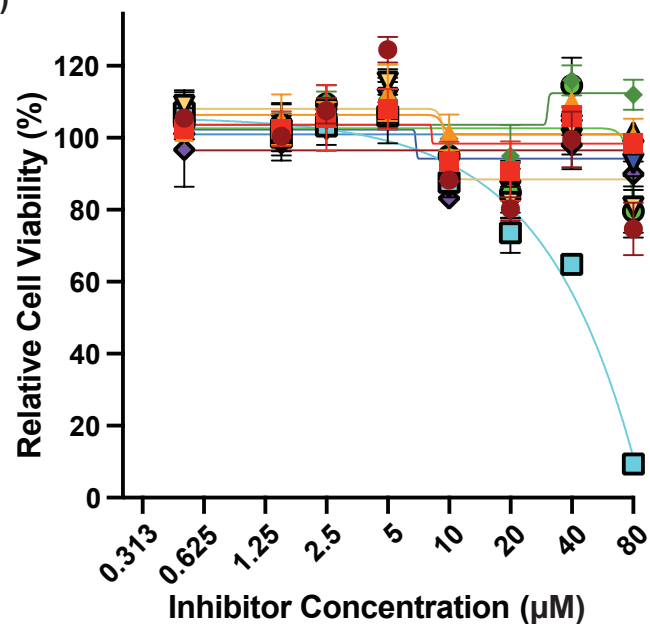

**Figure 5. Characterization of group B compounds.** A) Germination profiles of spores at phenotypic concentrations in the presence of group B compounds, each plot representing ~6,000 spores. B) Dose response curves of compounds B1 - B10 at concentrations from 2.5 to 80  $\mu\text{M}$  (error bars represent standard deviation). C) Cytotoxicity against mammalian fibroblasts dose response curves (error bars represents standard deviation).

296 The relevant substructure in all the group B compounds is a *furan carboxamide*. This structure is  
297 found in known carboxamide fungicides. These fungicides have historically been used against  
298 plant pathogens and are part of the Succinate Dehydrogenase Inhibitors (SDHIs) class of  
299 fungicides, which target complex II of the electron transport chain (ETC) (17). SDHIs are a large  
300 class of fungicides that includes compounds of diverse structures that vary in their specificity for  
301 different plant fungal pathogens (17). Group B shows strong structural similarity with one SDHI in  
302 particular, furcarbanil, which has a structure nearly identical to compound B1 with only a single  
303 ethyl group differentiating the two molecules. Due to this shared similarity, we hypothesized that  
304 furcarbanil would inhibit germination at a level akin to B1 (the weakest group B compound). In  
305 fact, furcarbanil demonstrated the asynchrony phenotype at the same phenotypic concentration  
306 as B1 (80  $\mu$ M), showing a nearly identical profile that was weaker than most group B compounds  
307 (**Figure 6A**).

308 Given these data, we hypothesized that other inhibitors of the ETC would result in the  
309 same germination phenotype as group B compounds and furcarbanil. To test this, we determined  
310 the inhibition phenotypes of Rotenone, TTFA, and Antimycin A, which are well characterized  
311 inhibitors of Complexes I, II, and III, respectively (**Figure 6A**). Each of these mitochondrial  
312 inhibitors demonstrated the asynchrony phenotype. Given the shared structural homology of  
313 group B to furan carboxamide SDHIs and the inhibitory phenotype of furcarbanil and other ETC  
314 inhibitors, we hypothesized that group B compounds hinder germination through ETC inhibition  
315 by targeting succinate dehydrogenase (complex II) specifically. To test the possibility that group  
316 B compounds inhibit the ETC, we performed oxygen consumption experiments to monitor the  
317 effects of these inhibitors on oxygen consumption rates of *Cryptococcus* yeast (**Figure 6B**). We  
318 tested a weak (Furcarbanil), an intermediate (B5) and a strong (B1) inhibitor of germination and  
319 found that all three compounds (at 10  $\mu$ M) were able to lower the oxygen consumption rate (OCR)  
320 of the cells. Furcarbanil showed initial inhibition followed by recovery, B5 showed low inhibition  
321 that was not recovered from, and B1 showed strong OCR inhibition. These results support the  
322 idea that group B compounds inhibit germination by obstructing the ETC. While it is formally  
323 possible that these inhibitors could be altering OCR through pathways other than direct ETC  
324 inhibition, all the data presented here support the hypothesis that group B compounds are novel  
325 ETC inhibitors, likely targeting complex II. These novel inhibitors exhibit strong antifungal activity  
326 and low mammalian cytotoxicity, making them prime candidates for development into novel  
327 antifungal therapeutics.

328

## 329 Discussion

330

331 In this study we combined two new phenotypic assays that target fungal spore germination to  
332 identify, validate, and characterize 191 novel fungal germination inhibitors. Using QGAs, we  
333 identified 6 distinct chemical phenotypes distinguished from one another on the basis of  
334 differences in germination synchronicity, germination rates, and overall population behavior.  
335 Compounds that targeted the same cellular function or had shared substructures induced similar  
336 phenotypes. Thus, QGAs identified phenotypic outliers and facilitated target identification via  
337 comparisons between structurally similar compounds with the same phenotypes to compounds  
338 with known cellular targets. We identified a group of novel putative fungal-specific electron  
339 transport chain inhibitors that are promising candidates for antifungal development. Most  
340 importantly, this study supports the idea that the germination process holds fungal-specific  
341 pathways that could serve as targets for new antifungal drugs.

342

343 Chemical phenotyping can help overcome the hurdles of phenotypic drug discovery

344

## Inhibitors of the Electron Transport Chain

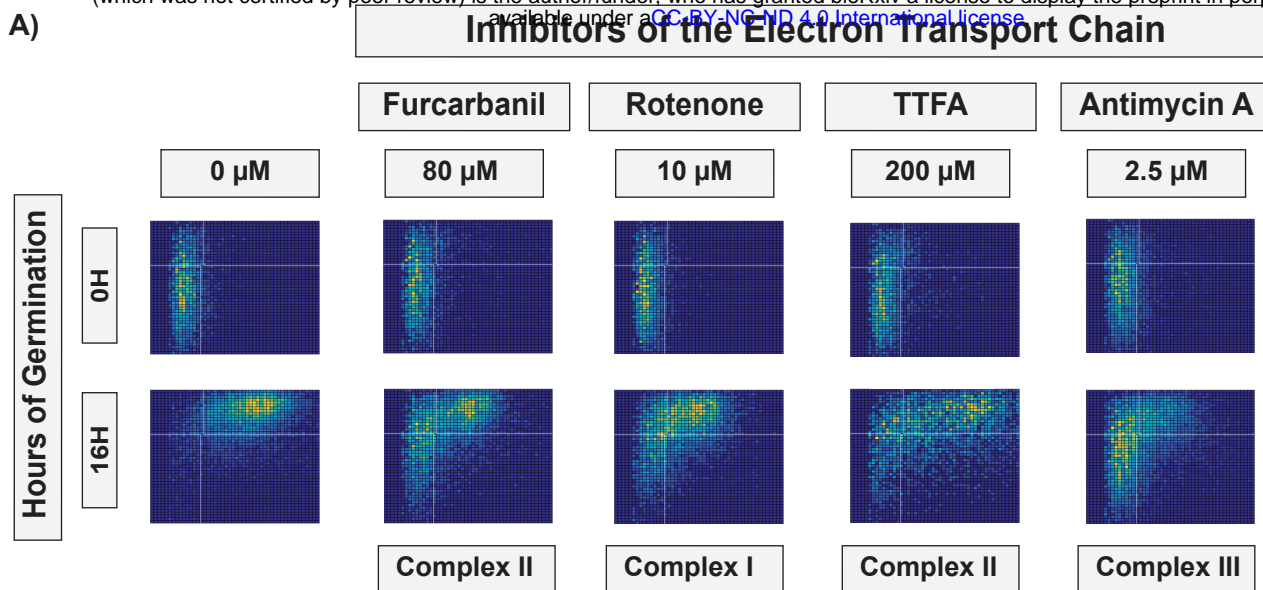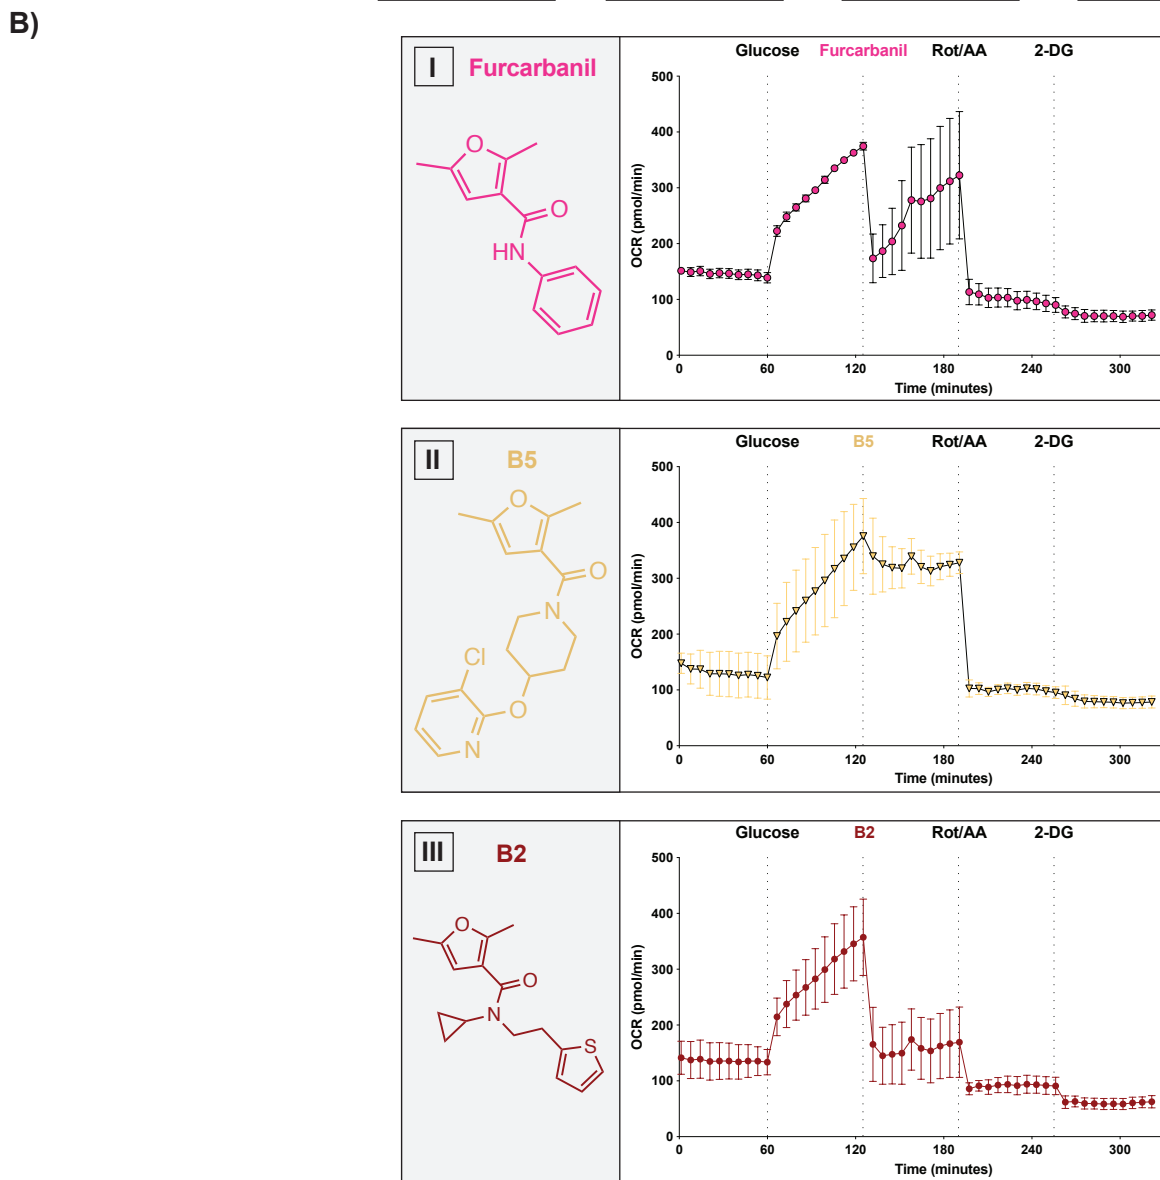

**Figure 6. Characterization of group B compounds as electron transport chain inhibitors.** A) Germination profiles of spores at phenotypic concentrations in the inhibitors Furcarbanil (80  $\mu\text{M}$ ), Rotenone (10  $\mu\text{M}$ ), TTFA (200  $\mu\text{M}$ ), Antimycin A (2.5  $\mu\text{M}$ ), each plot representing  $\sim 6,000$  spores. B) Oxygen Consumption Rate (OCR) plots of JEC21 yeast with injections every 60 minutes with first Glucose (20 mM), then either (I) Furcarbanil (10  $\mu\text{M}$ ), (II) B5 (10  $\mu\text{M}$ ), or (III) B2 (10  $\mu\text{M}$ ), then Rotenone/AntimycinA (50  $\mu\text{M}$ ), and finally 2-DG (100 mM) (error bars represent standard deviation).

345 The relative merits of targeted drug discovery vs. phenotypic drug discovery have been debated  
346 across fields; however, in antifungal drug discovery, one of the key issues is the lack of known  
347 fungal specific targets. This challenge supports using phenotypic drug discovery (PDD)  
348 approaches, but PDD presents other challenges such as 1) difficulties in validation of hits, 2) an  
349 inability to establish structure-activity relationships, and 3) difficulties in target identification (18).  
350 To overcome these limitations, new methods of phenotypic characterization have been used such  
351 as molecular phenotyping in which transcriptome analysis was used as a secondary screening  
352 method (19). This approach facilitated clustering of compounds based on shared profiles and  
353 helped identify their targets. Similarly, we used new phenotypic assays to both identify and  
354 characterize compounds and overcome the hurdles of PDD.

355 By using the NL-based high throughput screen for inhibitors of germination (as opposed  
356 to growth), we increased the specificity of our initial screen, reducing the number of hits and  
357 increasing the likelihood that the hits would be fungal-specific. Following the initial screen with  
358 QGAs enabled identification of bona fide inhibitors of germination, eliminated false positives from  
359 the working pool of compounds, and addressed the first major challenge in PDD (validation).  
360 QGAs were also used to address the second major PDD challenge (establishing structure-  
361 function relationships) via the generation of chemical phenotypes for each compound of interest.  
362 We showed that inhibitors that target the same biological process share the same chemical  
363 phenotype. Thus, by characterizing the phenotypes of each compound in a structural group, we  
364 established structure-activity relationships and identified phenotypic outliers that could have  
365 targets that differ from the group overall. Finally, the use of chemical phenotyping also addressed  
366 the third challenge by lowering the barriers to target identification. Population dynamics of  
367 germinating spores vary in the presence of different inhibitors, stressors, nutrients and mutations,  
368 all of which can be assessed using the QGA (7,12). These provide an opportunity for comparative  
369 analyses to facilitate target identification. By combining the testing of inhibitors with alteration of  
370 nutrients, inhibition of known targets, or creation of knockout and overexpression constructs, we  
371 can mimic, intensify, alter, or eliminate a germination phenotype and thereby identify the target  
372 processes and pathways of specific inhibitors. For example, in a previous study we found that  
373 disulfiram had a slow end phenotype (7), indicating that it inhibits a target that is important for the  
374 isotropic growth phase of germination. The more we learn about the molecular programming of  
375 spore germination, the more we can gain from this type of phenotypic analysis.

### 376 The electron transport chain as a fungal-specific target in antifungal development

377  
378  
379 The ETC has been suggested as a good target for antifungal drug development because of the  
380 role of respiration in regulating virulence traits and the existence of fungal-specific ETC elements.  
381 However, complex II/succinate dehydrogenase (SDH) has yet to be exploited (20). SDH could be  
382 a promising target, having been implicated in virulence of some human fungal pathogens.  
383 Specifically, SDH mRNA transcripts are overrepresented in *Cryptococcus* during murine  
384 pulmonary infections (21), and the SDH inhibitor Thenoyltrifluoroacetone (TTFA) has been shown  
385 to prevent hyphal formation in *Candida albicans*, a key virulence trait (22). It is unclear whether  
386 there are fungal-specific properties of SDH, but some carboxamide SDHs have shown narrow  
387 spectrum use against basidiomycete plant pathogens (17, 23), which suggests that fungal SDH  
388 is unique. Alternatively, some SDHs have been shown to also inhibit Complex III, implying more  
389 complex interactions (24). Nevertheless, it is promising that group B compounds in this study  
390 show high efficacy and low cytotoxicity, supporting the idea that their target(s) harbor fungal-  
391 specific features. While it is difficult to irrefutably conclude that group B inhibitors are targeting  
392 SDH, the data provided here strongly support this hypothesis. Future studies will be needed to  
393 fully characterize the mechanism of these inhibitors, to optimize them for increased antifungal  
394 potency and reduced mammalian cytotoxicity, and to test optimized inhibitors in murine models

395 of invasive fungal infections. Overall, this group of compounds is extremely promising for further  
396 development into antifungal drugs.

397

### 398 Spore germination as a target reservoir for antifungal therapeutics

399

400 Spore germination is a process that appears to be distinct from any process in humans, making  
401 it a potential reservoir for fungal-specific targets for drug development. Here, we determined that  
402 121 of the 191 germination inhibitors we identified showed preliminary low cytotoxicity against  
403 mammalian cells, suggesting that they may be targeting fungal-specific molecules. Additionally,  
404 both group A and B compounds showed relatively low cytotoxicity at relevant inhibitory  
405 concentrations, and germination inhibition ability was not linked to cytotoxicity. This provides the  
406 opportunity to modify their structures to maximize antifungal activity while minimizing human  
407 cytotoxicity, thus increasing the difference between the effective dose and the toxic dose, leading  
408 to a higher therapeutic index. These data support the idea that targeting spore germination will  
409 result in the identification of low toxicity antifungal drug candidates.

410 Targeting spore germination also provides an opportunity for prevention of fungal disease,  
411 which is an area of disease management that is under-explored in the field of human fungal  
412 pathogenesis. Spores play an important role in disease progression in the majority of invasive  
413 human fungal pathogens, and spore germination is required for spores to cause disease (8, 9).  
414 Therefore, inhibiting spore germination (in addition to the subsequent vegetative replication) could  
415 provide a unique opportunity for antifungal prophylaxis in immunocompromised individuals to  
416 prevent fatal disease. The potential role of germination inhibitors in antifungal prophylaxis has  
417 been explored previously (7), and with the identification of novel inhibitors of both germination  
418 and growth, the development of preventative therapeutics can now be pursued.

419

## 420 **Materials and Methods**

421

### 422 Strains and Strain Manipulation

423

424 *Cryptococcus neoformans* serotype D (*deneoformans*) strains JEC20, JEC21, CHY3833 and  
425 CHY3836 were handled using standard techniques and media as described previously (7, 25,  
426 26). *Cryptococcus* spores were isolated from cultures as described previously (27). Briefly, yeast  
427 of both mating types (JEC20 and JEC21 or CHY3833 and CHY 3836) were grown on yeast-  
428 peptone-dextrose (YPD) medium for 2 days at 30°C, combined at a 1:1 ratio in 1X phosphate  
429 buffered saline (PBS), and spotted onto V8 pH 7 agar plates. Plates were incubated for 5 days at  
430 25°C, and spots were resuspended in 75% Percoll in 1X PBS and subjected to gradient  
431 centrifugation. Spores were recovered, counted using a hemocytometer, and assessed for purity  
432 by visual inspection.

433

### 434 NanoLuciferase (NL) Germination Screen

435

436 All screening of the LifeChem Libraries (Life Chemicals) was carried out with the assistance of  
437 the University of Wisconsin—Madison (UW-Madison) Small Molecule Screening Facility. All NL  
438 screening was performed as described previously (7). Briefly, CHY3833 and CHY3836, reporter  
439 strains harboring a CNK01510-NL fusion construct, were used to produce spores for library  
440 screening. Screening was carried out with  $1 \times 10^4$  spores incubated in 384-well screening plates  
441 in 10  $\mu$ L of germination medium (0.5X YPD) for 10 h at 30°C. Cells were then incubated with 10  
442  $\mu$ L of Nano-Glo luciferase assay reagent (Promega Corporation) prepared as suggested by the  
443 manufacturer at 22°C for 10 min and then read using a Perkin-Elmer Enspire plate reader at 460  
444 nm.

445  
446  
447  
448  
449  
450  
451  
452  
453  
454  
455  
456  
457  
458  
459  
460  
461  
462  
463  
464  
465  
466  
467  
468  
469  
470  
471  
472  
473  
474  
475  
476  
477  
478  
479  
480  
481  
482  
483  
484  
485  
486  
487  
488  
489  
490  
491  
492  
493  
494

## Secondary Screens

### *NL Enzyme Test*

CHY3833 was grown overnight in liquid YPD, washed 3 times in 1X PBS and resuspended to an OD<sub>600</sub>=1.00. Cells (100 µL) were added to 384-well plate wells containing 10 µM of each compound and were incubated with 10 µL of Nano-Glo luciferase assay reagent (Promega Corporation) at 22°C for 10 min and then read using a Perkin-Elmer Enspire plate reader at 460 nm. Compounds that caused a >50% decrease in luciferase signal were determined to be NanoLuciferase enzyme assay inhibitors.

### *Yeast Replication*

CHY3833 and CHY3836 were each grown in YPD liquid overnight at 30°C to saturation and then resuspended in 0.5X YPD at an OD<sub>600</sub> of 0.005. Strains aliquoted into 384 well plates with inhibitors and grown for 12 hours at 30°C at 3000 RPM before OD<sub>600</sub> readings were taken. Compounds that caused a >10% decrease in growth were considered yeast growth inhibitors.

### *Fibroblast cytotoxicity*

1 x 10<sup>3</sup> normal human dermal fibroblasts (NHDF) cells per well were plated in a 384 well plate in cell culture medium. The cells were incubated with each compound of interest at 10 µM concentration for 72 hours at 37°C + 5% CO<sub>2</sub>. Following treatment, CellTiter-GLO (Promega) reagent was used to assay ATP dependent luminescence and thus provide a measure of cell viability. Compounds that resulted in <75% cell viability were considered low toxicity.

## Quantitative Germination Assay

Germination assays were modified from Barkal et al. 2016 to introduce automation, increase throughput, and refine assay consistency (12). Briefly, 384 well plates (Thermo Scientific: 142762) were loaded with 10<sup>5</sup> spores per well, and at 0 h, synthetic medium + 2% dextrose (SD) medium containing the compounds of interest was added to the sample (final volume of 40 µL). All compounds were tested initially at 80 µM; however, concentrations were changed on a case-by-case basis for subsequent experiments. All assays and controls were performed with a final concentration 0.8% DMSO (the compound solvent) unless specified otherwise. Spores were germinated at 30°C in a humidified chamber, and the same ~5 x 10<sup>3</sup> cells were monitored every 2 h for 16 h. Imaging was performed on a Ti2 Nikon microscope, and each condition was visualized in a minimum of two individual wells with three fields of view acquired from each well. All images were analyzed as described previously based on cell shape and size using ImageJ. The population ratios of spores, intermediates, and yeast were determined. Error bars in plots are based on the variation among all fields of view acquired. Level of germination was determined by quantifying the decrease in the proportion of spores in a population, and rates were quantified by determining the change in this proportion over time.

Translation inhibitors and concentrations: Cycloheximide (0.078 µM – 80µM) (Dot Scientific, Inc: DSC81040-1), G418 (1.6mM) (Fisher Scientific: AAJ6267106), and Puromycin (20 mM) (Dot Scientific, Inc: DSP33020-0.025) were tested with no DMSO (all were water-soluble), whereas Anisomycin (62.5 µM) (Sigma-Aldrich: A9789-5MG) was tested in 2.5% DMSO.



495 Mitochondrial inhibitors and concentrations: Furcarbanil (80  $\mu$ M) (Sigma-Aldrich: T313122),  
496 Rotenone (10  $\mu$ M) (Fisher Scientific: 501687383) and Antimycin A (2.5  $\mu$ M) (Santa Cruz  
497 Biotechnology, Inc: sc-202467A) were all tested in 0.8% DMSO, and TTFA (200  $\mu$ M) (Sigma-  
498 Aldrich: 88300-5G) was tested in 3% DMSO.

#### 499 500 Oxygen Consumption Rate (OCR) Experiments

501  
502 Oxygen consumption experiments were performed on a Seahorse Biosciences XFe96  
503 Extracellular Flux Analyzer, and the assays were modified from Lev et al 2020 (28). Briefly,  
504 cartridges were hydrated overnight in Agilent Seahorse XF calibrant. JEC21 yeast were grown  
505 overnight in YPD, washed with ddH<sub>2</sub>O and resuspended to OD<sub>600</sub>=0.8 in pH 7.4 (Agilent: 103575-  
506 100). Cells (180  $\mu$ L) were loaded into each well with the exception of blank wells, which were filled  
507 with XF DMEM Medium. Each injection solution was 10X the final volume in XF DMEM Medium.  
508 The assay was carried out at 30°C with injections occurring every 60 minutes. OCR was read  
509 every 6 minutes during each hour interval with 3 minutes of mixing and 3 minutes of measuring.  
510 The following final concentrations were achieved after each injection: a) 20 mM dextrose b) 10  
511  $\mu$ M of chosen inhibitor (furcarbanil, B2, or B5) and 1%DMSO c) 50  $\mu$ M Rotenone, 50  $\mu$ M Antimycin  
512 A and 1% DMSO and d) 100 mM 2-DG (Sigma-Aldrich: D8375-1G). Each condition was tested in  
513 triplicate.

#### 514 515 **Acknowledgments**

516  
517 We thank the staff at the Small Molecule Screening Facility at the University of Wisconsin Cancer  
518 Carbone Center for their assistance and expertise with support from National Institutes of Health  
519 (NIH) grant P30 CA014520. We specifically thank Gene Aniev, Spencer Ericksen, Song Guo, and  
520 Scott Wildman for their assistance and input. We also thank Hunter Gage, Megan McKeon, Anna  
521 Frerichs and Eddie Dominguez lab for their comments on the manuscript. Finally, we thank James  
522 (Muse) Davis for his microscopy brilliance in helping to automate our germination assay.

523  
524 This study was supported by an Individual Biomedical Research Award from The Hartwell  
525 Foundation to C.M.H., an NIH grant R01 AI137409 to C.M.H., and an HHMI Gilliam Fellowship to  
526 S.C.O.

#### 527 528 **References**

- 529  
530 1. Bongomin, F., Gago, S., Oladele, R. O., & Denning, D. W. (2017). Global and multi-national  
531 prevalence of fungal diseases-estimate precision. *Journal of fungi (Basel, Switzerland)*, 3(4), 57.  
532 <https://doi.org/10.3390/jof3040057>
- 533  
534 2. Roemer, T., & Krysan, D. J. (2014). Antifungal drug development: challenges, unmet clinical needs,  
535 and new approaches. *Cold Spring Harbor perspectives in medicine*, 4(5), a019703.  
536 <https://doi.org/10.1101/cshperspect.a019703>
- 537  
538 3. Fisher, M. C., Hawkins, N. J., Sanglard, D., & Gurr, S. J. (2018). Worldwide emergence of resistance  
539 to antifungal drugs challenges human health and food security. *Science (New York, N. Y.)*, 360(6390),  
540 739–742. <https://doi.org/10.1126/science.aap7999>
- 541  
542 4. Stop neglecting fungi. (2017). *Nature microbiology*, 2, 17120.  
543 <https://doi.org/10.1038/nmicrobiol.2017.120>
- 544

- 545 5. Brown, G. D., Denning, D. W., Gow, N. A., Levitz, S. M., Netea, M. G., & White, T. C. (2012). Hidden  
546 killers: human fungal infections. *Science translational medicine*, 4(165), 165rv13.  
547 <https://doi.org/10.1126/scitranslmed.3004404>  
548
- 549 6. Odds, F. C., Brown, A. J., & Gow, N. A. (2003). Antifungal agents: mechanisms of action. *Trends in*  
550 *microbiology*, 11(6), 272–279. [https://doi.org/10.1016/s0966-842x\(03\)00117-3](https://doi.org/10.1016/s0966-842x(03)00117-3)  
551
- 552 7. Ortiz, S. C., Huang, M., & Hull, C. M. (2019). Spore germination as a target for antifungal  
553 therapeutics. *Antimicrobial agents and chemotherapy*, 63(12), e00994-19.  
554 <https://doi.org/10.1128/AAC.00994-19>  
555
- 556 8. Huang, M., & Hull, C. M. (2017). Sporulation: how to survive on planet Earth (and beyond). *Current*  
557 *genetics*, 63(5), 831–838. <https://doi.org/10.1007/s00294-017-0694-7>  
558
- 559 9. Sephton-Clark, P., & Voelz, K. (2018). Spore germination of pathogenic filamentous fungi. *Advances*  
560 *in applied microbiology*, 102, 117–157. <https://doi.org/10.1016/bs.aambs.2017.10.002>  
561
- 562 10. Beattie, S. R., & Krysan, D. J. (2020). Antifungal drug screening: thinking outside the box to identify  
563 novel antifungal scaffolds. *Current opinion in microbiology*, 57, 1–6.  
564 <https://doi.org/10.1016/j.mib.2020.03.005>  
565
- 566 11. Zheng, W., Thorne, N., & McKew, J. C. (2013). Phenotypic screens as a renewed approach for drug  
567 discovery. *Drug discovery today*, 18(21-22), 1067–1073. <https://doi.org/10.1016/j.drudis.2013.07.001>  
568
- 569 12. Barkal, L. J., Walsh, N. M., Botts, M. R., Beebe, D. J., & Hull, C. M. (2016). Leveraging a high  
570 resolution microfluidic assay reveals insights into pathogenic fungal spore germination. *Integrative*  
571 *biology : quantitative biosciences from nano to macro*, 8(5), 603–615.  
572 <https://doi.org/10.1039/c6ib00012f>  
573
- 574 13. Osherov, N., & May, G. S. (2001). The molecular mechanisms of conidial germination. *FEMS*  
575 *microbiology letters*, 199(2), 153–160. <https://doi.org/10.1111/j.1574-6968.2001.tb10667.x>  
576
- 577 14. Huang, M., Hebert, A. S., Coon, J. J., & Hull, C. M. (2015). Protein composition of infectious spores  
578 reveals novel sexual development and germination factors in *Cryptococcus*. *PLoS genetics*, 11(8),  
579 e1005490. <https://doi.org/10.1371/journal.pgen.1005490>  
580
- 581 15. Cheng, T., Wang, Y., & Bryant, S. H. (2010). Investigating the correlations among the chemical  
582 structures, bioactivity profiles and molecular targets of small molecules. *Bioinformatics (Oxford,*  
583 *England)*, 26(22), 2881–2888. <https://doi.org/10.1093/bioinformatics/btq550>  
584
- 585 16. Hughes, J. P., Rees, S., Kalindjian, S. B., & Philpott, K. L. (2011). Principles of early drug  
586 discovery. *British journal of pharmacology*, 162(6), 1239–1249. [https://doi.org/10.1111/j.1476-](https://doi.org/10.1111/j.1476-5381.2010.01127.x)  
587 [5381.2010.01127.x](https://doi.org/10.1111/j.1476-5381.2010.01127.x)  
588
- 589 17. Sierotzki, H., & Scalliet, G. (2013). A review of current knowledge of resistance aspects for the next-  
590 generation succinate dehydrogenase inhibitor fungicides. *Phytopathology*, 103(9), 880–887.  
591 <https://doi.org/10.1094/PHYTO-01-13-0009-RVV>  
592
- 593 18. Moffat, J. G., Vincent, F., Lee, J. A., Eder, J., & Prunotto, M. (2017). Opportunities and challenges in  
594 phenotypic drug discovery: an industry perspective. *Nature reviews. Drug discovery*, 16(8), 531–543.  
595 <https://doi.org/10.1038/nrd.2017.111>  
596
- 597 19. Drawnel, F. M., Zhang, J. D., Küng, E., Aoyama, N., Benmansour, F., Araujo Del Rosario, A., Jensen  
598 Zoffmann, S., Delobel, F., Prummer, M., Weibel, F., Carlson, C., Anson, B., Iacone, R., Certa, U.,  
599 Singer, T., Ebeling, M., & Prunotto, M. (2017). Molecular phenotyping combines molecular

- 600 information, biological relevance, and patient data to improve productivity of early drug discovery. *Cell*  
601 *chemical biology*, 24(5), 624–634.e3. <https://doi.org/10.1016/j.chembiol.2017.03.016>  
602
- 603 20. Duvenage, L., Munro, C. A., & Gourlay, C. W. (2019). The potential of respiration inhibition as a new  
604 approach to combat human fungal pathogens. *Current genetics*, 65(6), 1347–1353.  
605 <https://doi.org/10.1007/s00294-019-01001-w>  
606
- 607 21. Hu, G., Cheng, P. Y., Sham, A., Perfect, J. R., & Kronstad, J. W. (2008). Metabolic adaptation in  
608 *Cryptococcus neoformans* during early murine pulmonary infection. *Molecular microbiology*, 69(6),  
609 1456–1475. <https://doi.org/10.1111/j.1365-2958.2008.06374.x>  
610
- 611 22. Watanabe, T., Ogasawara, A., Mikami, T., & Matsumoto, T. (2006). Hyphal formation of *Candida*  
612 *albicans* is controlled by electron transfer system. *Biochemical and biophysical research*  
613 *communications*, 348(1), 206–211. <https://doi.org/10.1016/j.bbrc.2006.07.066>  
614
- 615 23. White, G.A., & Thorn, G.D. (1975). Structure-activity relationships of carboxamide fungicides and the  
616 succinic dehydrogenase complex of *Cryptococcus laurentii* and *Ustilago maydis*. *Pesticide*  
617 *Biochemistry and Physiology*, 5(4), 380-395. [https://doi.org/10.1016/0048-3575\(75\)90058-9](https://doi.org/10.1016/0048-3575(75)90058-9)  
618
- 619 24. Bénit, P., Kahn, A., Chretien, D., Bortoli, S., Huc, L., Schiff, M., Gimenez-Roqueplo, A. P., Favier, J.,  
620 Gressens, P., Rak, M., & Rustin, P. (2019). Evolutionarily conserved susceptibility of the  
621 mitochondrial respiratory chain to SDHI pesticides and its consequence on the impact of SDHIs on  
622 human cultured cells. *PloS one*, 14(11), e0224132. <https://doi.org/10.1371/journal.pone.0224132>  
623
- 624 25. Kwon-Chung, K. J., Edman, J. C., & Wickes, B. L. (1992). Genetic association of mating types and  
625 virulence in *Cryptococcus neoformans*. *Infection and immunity*, 60(2), 602–605.  
626 <https://doi.org/10.1128/IAI.60.2.602-605.1992>  
627
- 628 26. Sherman F, Fink GR, Hicks JB. (1987). Laboratory course manual for methods in yeast genetics.  
629 Cold Spring Harbor Laboratory, Cold Spring Harbor, NY.  
630
- 631 27. Botts, M. R., Giles, S. S., Gates, M. A., Kozel, T. R., & Hull, C. M. (2009). Isolation and  
632 characterization of *Cryptococcus neoformans* spores reveal a critical role for capsule biosynthesis  
633 genes in spore biogenesis. *Eukaryotic cell*, 8(4), 595–605. <https://doi.org/10.1128/EC.00352-08>  
634
- 635 28. Lev, S., Li, C., Desmarini, D., Liuwantara, D., Sorrell, T. C., Hawthorne, W. J., & Djordjevic, J. T.  
636 (2020). Monitoring glycolysis and respiration highlights metabolic inflexibility of *Cryptococcus*  
637 *neoformans*. *Pathogens (Basel, Switzerland)*, 9(9), 684. <https://doi.org/10.3390/pathogens9090684>  
638  
639

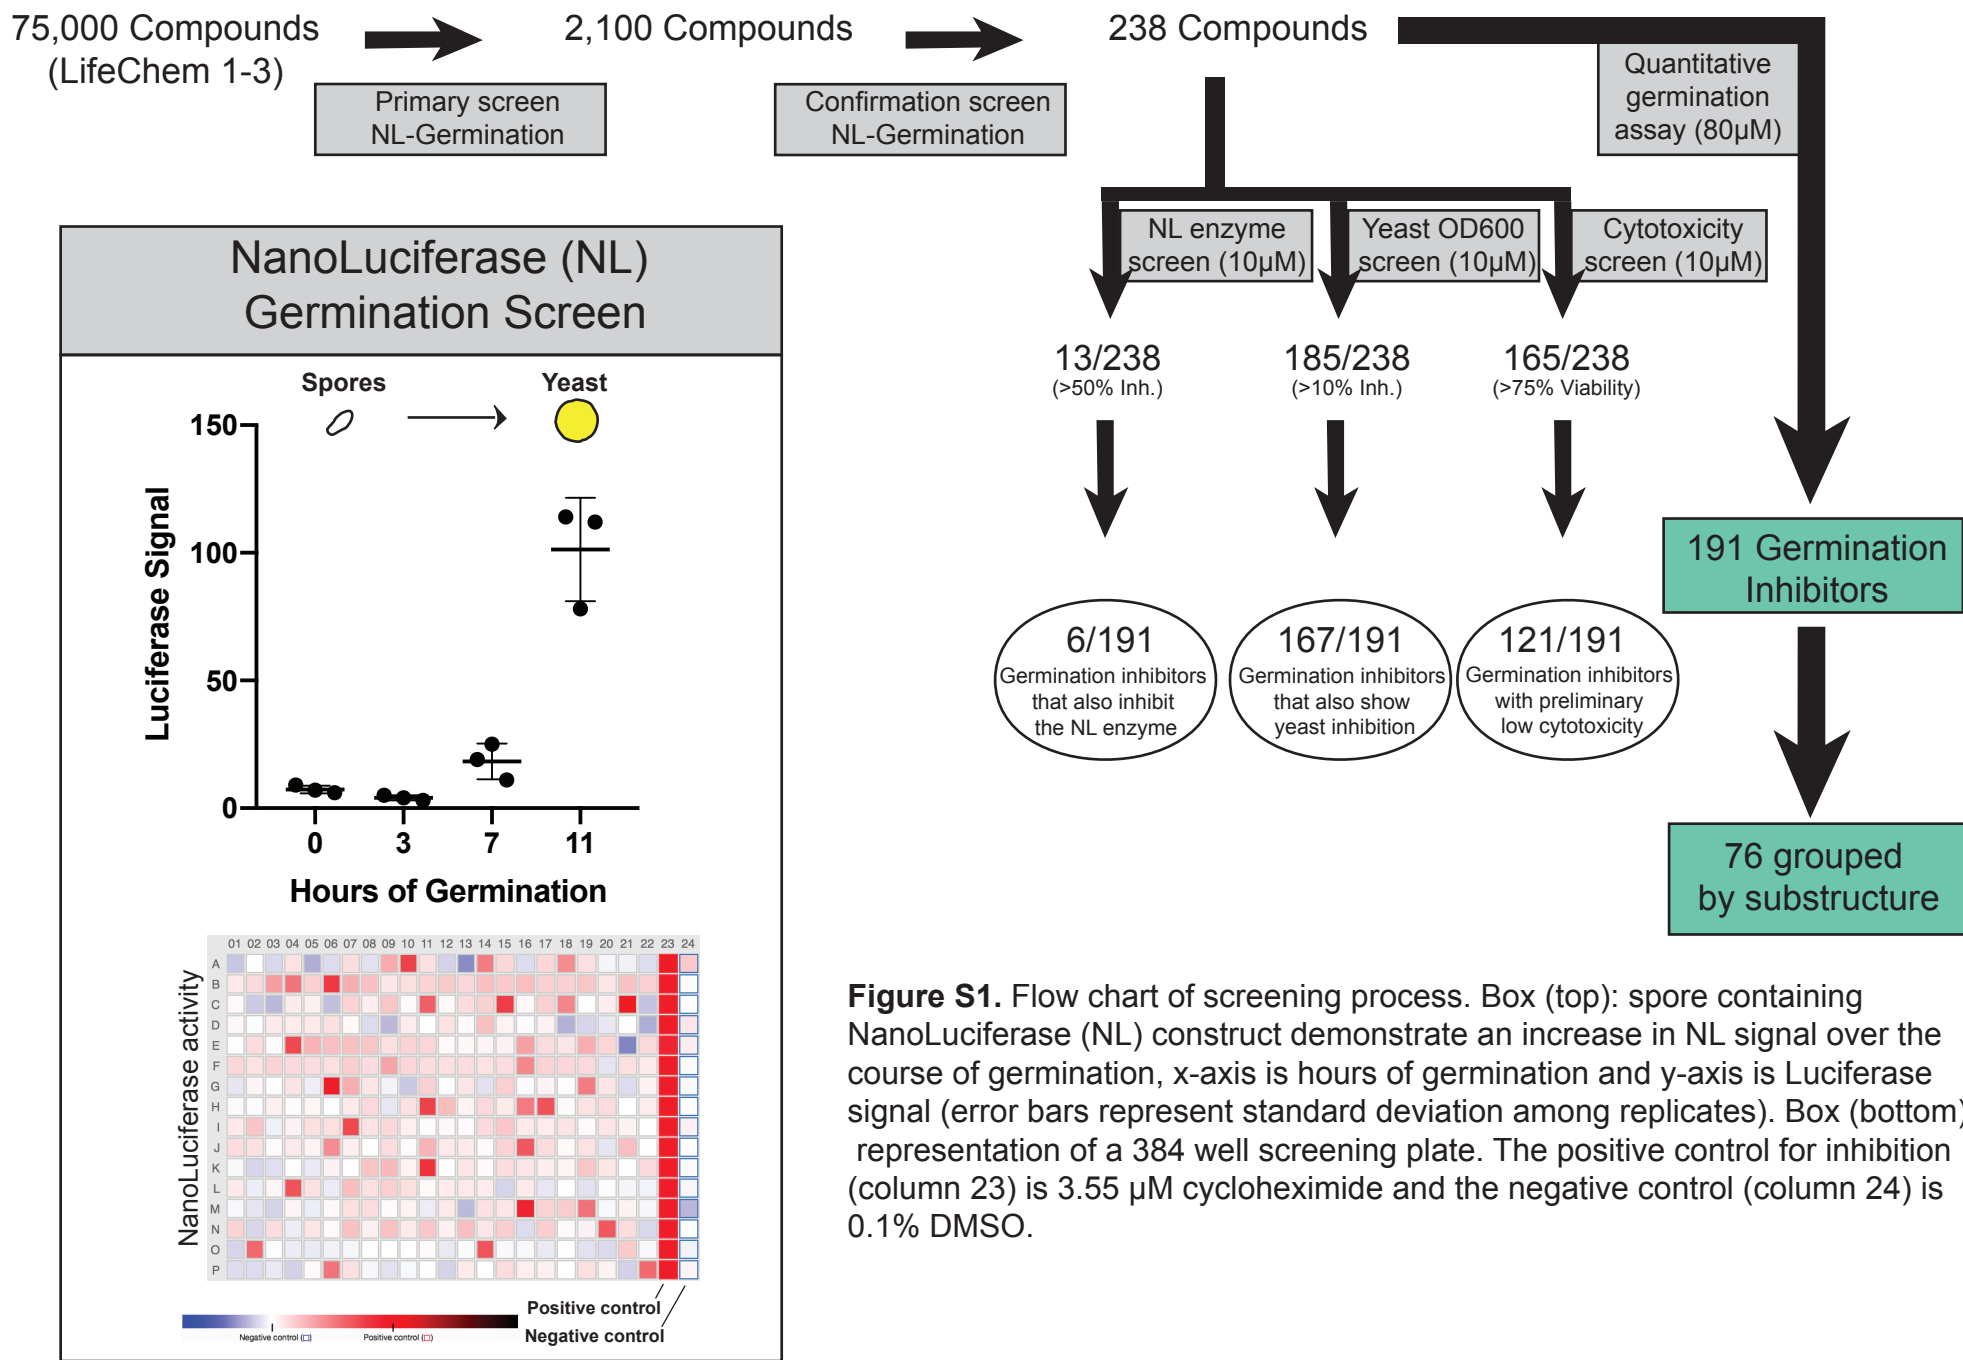

**Figure S1.** Flow chart of screening process. Box (top): spore containing NanoLuciferase (NL) construct demonstrate an increase in NL signal over the course of germination, x-axis is hours of germination and y-axis is Luciferase signal (error bars represent standard deviation among replicates). Box (bottom): representation of a 384 well screening plate. The positive control for inhibition (column 23) is 3.55 µM cycloheximide and the negative control (column 24) is 0.1% DMSO.
